# Supplementary material for: Identifying key environmental objectives for integrated process and fuel design
Source: Royal Society of Chemistry journal article supplement (doi:10.1039/d3se01602a), 2024-01-01
Supplement: d3se01602a2.xlsx [file d3se01602a2.xlsx]

## Sheet: Overview
Electronic supplementary data
Identifying key environmental objectives for integrated process and fuel design
Simon Voelkera, Philipp Ackermannb, Marcel Granderatha, Clemens Kortmannb, Joern Viellb, Alexander Mitsosc,b,d, Niklas von der Assenc,a,*
a Institute of Technical Thermodynamics, RWTH Aachen University, Aachen 52062, Germany
b Process Systems Engineering, RWTH Aachen University, Aachen 52074, Germany
c JARA-ENERGY, 52056 Aachen, GERMANY
d Energy Systems Engineering (IEK-10), Forschungszentrum Jülich, Jülich 52425, Germany
* Corresponding author: niklas.vonderassen@ltt.rwth-aachen.de
Overview
Table name	Sheet name	Content
Table S6	SOL_full_today	Pareto-optimal solution set generated in the full objective space: 'today' scenario
Table S7	SOL_full_future	Pareto-optimal solution set generated in the full objective space: 'future' scenario
Table S8	OR_out_today	Objective reduction output: 'today' scenario
Table S9	OR_out_future	Objective reduction output: 'future' scenario
Table S10	CORR_today	Correlation matrix: 'today' scenario
Table S11	CORR_future	Correlation matrix: 'future' scenario
Table S12	SOL_red_today	Pareto-optimal solution set generated in the reduced objective space: 'today' scenario
Table S13	SOL_red_future	Pareto-optimal solution set generated in the reduced objective space: 'future' scenario

## Sheet: SOL_full_today
Table S6
Caption:	Initial Pareto-optimal solutions generated in the full objective space that serve as input for the objective reduction in the ‘today’ scenario.
#	acidification	GWI	ecotoxicity_freshwater	energy_resources_non_renewable	eutrophication_freshwater	eutrophication_marine	eutrophication_terrestrial	human_toxicity_carcinogenic	human_toxicity_non_carcinogenic	ionising_radiation_human_health	land_use	resources_metals_minerals	ozone_depletion	particulate_matter_formation	photochemical_ozone_formation_human_health	water_use	C
1	0.0893865	29.66	294.924	419.454	0.00362517	0.0201171	0.208387	1.7209e-08	4.065e-07	1.2132	13336.6	7.0432e-05	7.1739e-06	6.5931e-07	0.102269	6.77422	71.4341
2	0.0954286	30.3707	360.777	427.349	0.0033745	0.0203599	0.209681	2.6716e-08	4.7266e-07	1.2042	9011.72	0.00016835	7.1739e-06	7.7749e-07	0.0906713	7.96482	71.4341
3	0.087815	28.5088	273.005	403.921	0.00347684	0.0202738	0.209068	1.5464e-08	3.8698e-07	1.1657	15738.1	4.7019e-05	7.1739e-06	6.5931e-07	0.110365	6.13782	71.4341
4	0.0907593	25.9203	296.793	367.198	0.00260633	0.0207859	0.209024	2.291e-08	4.1814e-07	0.997523	16096.8	0.00011109	3.1872e-06	8.1666e-07	0.114745	6.05808	71.4341
5	0.0925237	26.8667	299.378	382.794	0.00238139	0.0200017	0.202412	2.1869e-08	3.9373e-07	0.989559	13336.6	0.00010877	3.2711e-06	8.2826e-07	0.104263	5.86794	71.4341
6	0.14438	44.6783	620.241	624.569	0.00454116	0.0285024	0.296994	5.2091e-08	7.5253e-07	1.72177	4686.84	0.00040212	3.2422e-06	1.2647e-06	0.105133	12.4617	71.4341
7	0.0907593	25.9203	296.793	367.198	0.00260633	0.0207859	0.209024	2.291e-08	4.1814e-07	0.997523	16096.8	0.00011109	3.1872e-06	8.1666e-07	0.114745	6.05808	71.4341
8	0.0914967	26.3158	297.873	373.716	0.00251233	0.0204582	0.206261	2.2475e-08	4.0794e-07	0.994195	14943.3	0.00011012	3.2222e-06	8.215e-07	0.110365	5.97862	71.4341
9	0.0907593	25.9203	296.793	367.198	0.00260633	0.0207859	0.209024	2.291e-08	4.1814e-07	0.997523	16096.8	0.00011109	3.1872e-06	8.1666e-07	0.114745	6.05808	71.4341
10	0.0907593	25.9203	296.793	367.198	0.00260633	0.0207859	0.209024	2.291e-08	4.1814e-07	0.997523	16096.8	0.00011109	3.1872e-06	8.1666e-07	0.114745	6.05808	26.8642
11	0.0922045	28.7141	265.169	412.347	0.0025998	0.0193945	0.200078	1.3883e-08	3.3088e-07	1.05585	13336.6	3.677e-05	3.4414e-06	7.4947e-07	0.101984	5.06762	71.4341
12	0.0998217	32.8973	352.153	465.438	0.00356501	0.0202056	0.215484	2.1823e-08	4.1682e-07	1.28432	9011.72	0.00013223	2.8394e-06	7.6865e-07	0.0916421	6.59279	71.4341
13	0.15156	52.0434	595.549	732.155	0.005773	0.0282769	0.312895	3.8354e-08	6.4169e-07	2.04417	4686.84	0.00029232	3.4643e-06	1.1274e-06	0.105632	10.2773	71.4341
14	0.0894403	27.2314	261.122	387.912	0.00295227	0.0206236	0.210439	1.5514e-08	3.6914e-07	1.06834	17661.5	4.0404e-05	3.31e-06	7.313e-07	0.118407	5.36604	71.4341
15	0.0894403	27.2314	261.122	387.912	0.00295227	0.0206236	0.210439	1.5514e-08	3.6914e-07	1.06834	17661.5	4.0404e-05	3.31e-06	7.313e-07	0.118407	5.36604	71.4341
16	0.0894403	27.2314	261.122	387.912	0.00295227	0.0206236	0.210439	1.5514e-08	3.6914e-07	1.06834	17661.5	4.0404e-05	3.31e-06	7.313e-07	0.118407	5.36604	71.4341
17	0.0894403	27.2314	261.122	387.912	0.00295227	0.0206236	0.210439	1.5514e-08	3.6914e-07	1.06834	17661.5	4.0404e-05	3.31e-06	7.313e-07	0.118407	5.36604	71.4341
18	0.0894403	27.2314	261.122	387.912	0.00295227	0.0206236	0.210439	1.5514e-08	3.6914e-07	1.06834	17661.5	4.0404e-05	3.31e-06	7.313e-07	0.118407	5.36604	71.4341
19	0.0907938	27.9574	263.103	399.877	0.00277966	0.0200217	0.205365	1.4715e-08	3.504e-07	1.06222	15543.6	3.8624e-05	3.3743e-06	7.402e-07	0.110365	5.21981	71.4341
20	0.0894403	27.2314	261.122	387.912	0.00295227	0.0206236	0.210439	1.5514e-08	3.6914e-07	1.06834	17661.5	4.0404e-05	3.31e-06	7.313e-07	0.118407	5.36604	26.8642
21	0.0907593	25.9203	296.793	367.198	0.00260633	0.0207859	0.209024	2.291e-08	4.1814e-07	0.997523	16096.8	0.00011109	3.1872e-06	8.1666e-07	0.114745	6.05808	71.4341
22	0.0907593	25.9203	296.793	367.198	0.00260633	0.0207859	0.209024	2.291e-08	4.1814e-07	0.997523	16096.8	0.00011109	3.1872e-06	8.1666e-07	0.114745	6.05808	71.4341
23	0.0907593	25.9203	296.793	367.198	0.00260633	0.0207859	0.209024	2.291e-08	4.1814e-07	0.997523	16096.8	0.00011109	3.1872e-06	8.1666e-07	0.114745	6.05808	71.4341
24	0.0907593	25.9203	296.793	367.198	0.00260633	0.0207859	0.209024	2.291e-08	4.1814e-07	0.997523	16096.8	0.00011109	3.1872e-06	8.1666e-07	0.114745	6.05808	71.4341
25	0.0907593	25.9203	296.793	367.198	0.00260633	0.0207859	0.209024	2.291e-08	4.1814e-07	0.997523	16096.8	0.00011109	3.1872e-06	8.1666e-07	0.114745	6.05808	71.4341
26	0.0907593	25.9203	296.793	367.198	0.00260633	0.0207859	0.209024	2.291e-08	4.1814e-07	0.997523	16096.8	0.00011109	3.1872e-06	8.1666e-07	0.114745	6.05808	71.4341
27	0.092509	26.8704	303.397	382.317	0.00243387	0.0201019	0.203274	2.2495e-08	4.0209e-07	0.99693	13336.6	0.00011467	3.2248e-06	8.2814e-07	0.104474	6.02483	71.4341
28	0.095296	29.6314	356.368	417.779	0.00310255	0.0201281	0.206754	2.6723e-08	4.6075e-07	1.15126	9011.72	0.00017037	2.6842e-06	8.0199e-07	0.0904983	7.59652	71.4341
29	0.0915174	26.3385	301.944	373.552	0.00256029	0.0205427	0.20699	2.308e-08	4.1581e-07	1.00141	14888	0.00011597	3.1776e-06	8.2162e-07	0.110365	6.1317	71.4341
30	0.0907593	25.9203	296.793	367.198	0.00260633	0.0207859	0.209024	2.291e-08	4.1814e-07	0.997523	16096.8	0.00011109	3.1872e-06	8.1666e-07	0.114745	6.05808	71.4341
31	0.0907593	25.9203	296.793	367.198	0.00260633	0.0207859	0.209024	2.291e-08	4.1814e-07	0.997523	16096.8	0.00011109	3.1872e-06	8.1666e-07	0.114745	6.05808	41.7208
32	0.0907593	25.9203	296.793	367.198	0.00260633	0.0207859	0.209024	2.291e-08	4.1814e-07	0.997523	16096.8	0.00011109	3.1872e-06	8.1666e-07	0.114745	6.05808	26.8642
33	0.230988	61.4873	1166.79	907.124	0.00286843	0.0425703	0.431011	7.2022e-08	9.4914e-07	1.94104	9725.37	0.00053388	7.1739e-06	2.3067e-06	0.172237	19.6288	71.4341
34	0.230988	61.4873	1166.79	907.124	0.00286843	0.0425703	0.431011	7.2022e-08	9.4914e-07	1.94104	9725.37	0.00053388	7.1739e-06	2.3067e-06	0.172237	19.6288	71.4341
35	0.230988	61.4873	1166.79	907.124	0.00286843	0.0425703	0.431011	7.2022e-08	9.4914e-07	1.94104	9725.37	0.00053388	7.1739e-06	2.3067e-06	0.172237	19.6288	71.4341
36	0.231254	61.4716	1166.79	909.225	0.00289313	0.0424684	0.431686	7.2197e-08	9.466e-07	1.94933	9634.59	0.00054323	7.1739e-06	2.3067e-06	0.172237	19.6288	71.4341
37	0.202897	50.2997	1166.79	909.672	0.00280992	0.0375247	0.387966	7.487e-08	8.7483e-07	1.59114	10689.5	0.00058632	7.1739e-06	2.0779e-06	0.172237	19.6288	71.4341
38	0.230988	61.4873	1166.79	907.124	0.00286843	0.0425703	0.431011	7.2022e-08	9.4914e-07	1.94104	9725.37	0.00053388	7.1739e-06	2.3067e-06	0.172237	19.6288	71.4341
39	0.229832	62.2296	1166.79	977.073	0.00262195	0.041386	0.421262	5.9489e-08	8.2461e-07	1.83934	10113.5	0.0004118	7.1739e-06	2.2435e-06	0.172237	19.6288	71.4341
40	0.231107	64.6111	1166.79	1105.21	0.00242737	0.0405562	0.412078	4.4109e-08	6.8965e-07	1.72546	10049.4	0.00024476	7.1739e-06	2.1888e-06	0.172237	19.6288	71.4341
41	0.228135	65.5266	1166.79	1176.22	0.00233009	0.0391934	0.400803	2.8728e-08	5.5233e-07	1.65101	10871.4	9.6831e-05	7.1739e-06	2.077e-06	0.172237	19.6288	71.4341
42	0.230988	61.4873	1166.79	907.124	0.00286843	0.0425703	0.431011	7.2022e-08	9.4914e-07	1.94104	9725.37	0.00053388	7.1739e-06	2.3067e-06	0.172237	19.6288	71.4341
43	0.231254	61.4716	1166.79	909.227	0.00289315	0.0424684	0.431687	7.2197e-08	9.466e-07	1.94934	9634.53	0.00054324	7.1739e-06	2.3067e-06	0.172237	19.6288	71.4341
44	0.229339	62.988	1166.79	1030.36	0.00250304	0.0407915	0.415299	5.1406e-08	7.5183e-07	1.77794	10298.6	0.00032786	7.1739e-06	2.2038e-06	0.172237	19.6288	71.4341
45	0.226125	64.2315	1166.79	1202.03	0.0023722	0.0384435	0.397893	3.154e-08	5.3507e-07	1.54851	10230.7	0.0001299	7.1739e-06	2.0926e-06	0.172237	19.6288	71.4341
46	0.230988	61.4873	1166.79	907.124	0.00286843	0.0425703	0.431011	7.2022e-08	9.4914e-07	1.94104	9725.37	0.00053388	7.1739e-06	2.3067e-06	0.172237	19.6288	71.4341
47	0.230988	61.4873	1166.79	907.124	0.00286843	0.0425703	0.431011	7.2022e-08	9.4914e-07	1.94104	9725.37	0.00053388	7.1739e-06	2.3067e-06	0.172237	19.6288	71.4341
48	0.231256	61.4715	1166.79	909.242	0.00289333	0.0424676	0.431692	7.2198e-08	9.4658e-07	1.9494	9633.88	0.0005433	7.1739e-06	2.3067e-06	0.172237	19.6288	71.4341
49	0.217946	56.353	1166.79	896.421	0.00267269	0.0400577	0.410875	6.8988e-08	8.6286e-07	1.68641	10589.1	0.00052048	7.1739e-06	2.2216e-06	0.172237	19.6288	71.4341
50	0.231253	61.4717	1166.79	909.218	0.00289305	0.0424688	0.431684	7.2196e-08	9.4661e-07	1.94931	9634.89	0.0005432	7.1739e-06	2.3067e-06	0.172237	19.6288	71.4341
51	0.231254	61.4716	1166.79	909.229	0.00289318	0.0424682	0.431688	7.2197e-08	9.466e-07	1.94935	9634.43	0.00054325	7.1739e-06	2.3067e-06	0.172237	19.6288	71.4341
52	0.232272	61.9176	1166.79	934.114	0.00307263	0.0424464	0.433483	7.487e-08	9.5846e-07	1.98457	9011.72	0.00056181	7.1739e-06	2.3067e-06	0.172237	19.6288	71.4341
53	0.230988	61.4873	1166.79	907.124	0.00286843	0.0425703	0.431011	7.2022e-08	9.4914e-07	1.94104	9725.37	0.00053388	7.1739e-06	2.3067e-06	0.172237	19.6288	71.4341
54	0.229348	61.6718	1166.79	948.666	0.00267186	0.0417255	0.423082	6.344e-08	8.66e-07	1.86214	10128.4	0.00044863	7.1739e-06	2.2586e-06	0.172237	19.6288	71.4341
55	0.230603	63.6683	1166.79	1054.45	0.00250455	0.0408852	0.41572	5.0203e-08	7.4313e-07	1.7706	10074.5	0.00031095	7.1739e-06	2.2105e-06	0.172237	19.6288	71.4341
56	0.231651	65.6301	1166.79	1160.05	0.00234414	0.0402021	0.408145	3.753e-08	6.3196e-07	1.6767	10022	0.00017326	7.1739e-06	2.1654e-06	0.172237	19.6288	71.4341
57	0.231256	61.4715	1166.79	909.242	0.00289333	0.0424676	0.431692	7.2198e-08	9.4658e-07	1.9494	9633.88	0.0005433	7.1739e-06	2.3067e-06	0.172237	19.6288	71.4341
58	0.216564	55.9699	1166.79	883.481	0.00277067	0.0398702	0.409157	7.487e-08	8.7742e-07	1.70584	10271.5	0.00053518	5.9914e-06	2.2062e-06	0.172237	19.6288	71.4341
59	0.205009	51.9367	1166.79	907.869	0.00271439	0.0376453	0.389695	7.487e-08	8.051e-07	1.46518	10446.1	0.00051055	4.809e-06	2.1267e-06	0.172237	19.6288	71.4341
60	0.230988	61.4873	1166.79	907.124	0.00286843	0.0425703	0.431011	7.2022e-08	9.4914e-07	1.94104	9725.37	0.00053388	7.1739e-06	2.3067e-06	0.172237	19.6288	71.4341
61	0.230988	61.4873	1166.79	907.124	0.00286843	0.0425703	0.431011	7.2022e-08	9.4914e-07	1.94104	9725.37	0.00053388	7.1739e-06	2.3067e-06	0.172237	19.6288	71.4341
62	0.21393	58.8419	1166.79	894.994	0.00377953	0.0397525	0.405337	6.7566e-08	1.0009e-06	2.13732	6675.97	0.00058632	7.1739e-06	2.0096e-06	0.151613	19.6288	71.4341
63	0.174301	46.877	1166.79	787.878	0.00381017	0.0327361	0.340654	5.0623e-08	9.0918e-07	2.0473	6970.42	0.00058632	7.1739e-06	1.4997e-06	0.130989	19.6288	71.4341
64	0.147477	42.4381	1166.79	645.245	0.00403258	0.0287161	0.296789	4.981e-08	7.889e-07	1.74202	5678.12	0.0004569	7.1739e-06	1.2828e-06	0.110365	14.8359	71.4341
65	0.230988	61.4873	1166.79	907.124	0.00286843	0.0425703	0.431011	7.2022e-08	9.4914e-07	1.94104	9725.37	0.00053388	7.1739e-06	2.3067e-06	0.172237	19.6288	71.4341
66	0.225348	59.4861	1166.79	877.187	0.00268374	0.0414107	0.419569	7.487e-08	9.1819e-07	1.84935	10286.1	0.00052528	7.1739e-06	2.2977e-06	0.172237	15.8838	71.4341
67	0.226245	60.9228	1166.79	934.466	0.00267983	0.0409812	0.417431	6.5283e-08	8.3734e-07	1.85801	10237.6	0.00042665	7.1739e-06	2.21e-06	0.172237	19.6288	56.5775
68	0.222846	61.2486	1166.79	983.424	0.00262139	0.0397311	0.405238	6.1584e-08	7.4338e-07	1.79786	10188.5	0.00031255	7.1739e-06	2.1222e-06	0.172237	19.6288	41.7208
69	0.219002	61.3958	1166.79	1026.72	0.00255067	0.0383399	0.392849	5.6288e-08	6.4004e-07	1.73787	10366.3	0.00019818	7.1739e-06	2.0253e-06	0.172237	19.6288	26.8642
70	0.0954931	30.1814	1166.79	441.762	0.00299419	0.0193636	0.201735	1.4089e-08	3.4993e-07	1.14922	11598	5.0698e-05	7.1739e-06	7.1898e-07	0.0962569	6.12087	71.4341
71	0.0953384	30.3869	1166.79	444.223	0.00309343	0.0193762	0.202321	1.4096e-08	3.5344e-07	1.16682	11493.8	5.1858e-05	7.1739e-06	7.0875e-07	0.0958517	6.21364	71.4341
72	0.151	50.857	1166.79	719.131	0.00581024	0.0282033	0.311731	4.1331e-08	6.6512e-07	2.0269	4686.84	0.0003249	7.1739e-06	1.1296e-06	0.105731	10.7544	71.4341
73	0.0953109	30.3692	1166.79	444.07	0.00309307	0.0193717	0.202272	1.3865e-08	3.5317e-07	1.16623	11493.7	5.1701e-05	3.6265e-06	7.0863e-07	0.0958354	6.20863	71.4341
74	0.0953384	30.3869	1166.79	444.223	0.00309343	0.0193762	0.202321	1.4096e-08	3.5344e-07	1.16682	11493.8	5.1858e-05	7.1739e-06	7.0875e-07	0.0958517	6.21364	56.5775
75	0.0953384	30.3869	1166.79	444.223	0.00309343	0.0193762	0.202321	1.4096e-08	3.5344e-07	1.16682	11493.8	5.1858e-05	7.1739e-06	7.0875e-07	0.0958517	6.21364	41.7208
76	0.0953384	30.3869	1166.79	444.223	0.00309343	0.0193762	0.202321	1.4096e-08	3.5344e-07	1.16682	11493.8	5.1858e-05	7.1739e-06	7.0875e-07	0.0958517	6.21364	26.8642
77	0.25345	89.7754	1166.79	1320.66	0.00885816	0.0444	0.502465	2.7461e-08	7.5183e-07	3.35268	8919.52	0.00017692	7.1739e-06	1.6683e-06	0.172237	19.6288	71.4341
78	0.233784	75.8602	1166.79	1360.85	0.00570404	0.0395526	0.436889	2.2738e-08	5.3507e-07	2.24163	9233.79	8.5788e-05	7.1739e-06	1.8141e-06	0.172237	19.6288	71.4341
79	0.226265	60.3785	1166.79	1032.74	0.00300603	0.0408921	0.419718	6.7997e-08	8.5515e-07	1.68641	8639.43	0.00048677	7.1739e-06	2.2873e-06	0.172237	19.6288	71.4341
80	0.299471	101.721	1166.79	1439	0.00980178	0.0524625	0.580762	7.487e-08	1.1854e-06	3.80234	361.956	0.00058632	7.1739e-06	2.3067e-06	0.172237	19.6288	71.4341
81	0.299471	101.721	1166.79	1439	0.00980178	0.0524625	0.580762	7.487e-08	1.1854e-06	3.80234	361.956	0.00058632	7.1739e-06	2.3067e-06	0.172237	19.6288	71.4341
82	0.299471	101.721	1166.79	1439	0.00980178	0.0524625	0.580762	7.487e-08	1.1854e-06	3.80234	361.956	0.00058632	7.1739e-06	2.3067e-06	0.172237	19.6288	71.4341
83	0.299471	101.721	1166.79	1439	0.00980178	0.0524625	0.580762	7.487e-08	1.1854e-06	3.80234	361.956	0.00058632	7.1739e-06	2.3067e-06	0.172237	19.6288	71.4341
84	0.299471	101.721	1166.79	1439	0.00980178	0.0524625	0.580762	7.487e-08	1.1854e-06	3.80234	361.956	0.00058632	7.1739e-06	2.3067e-06	0.172237	19.6288	71.4341
85	0.299471	101.721	1166.79	1439	0.00980178	0.0524625	0.580762	7.487e-08	1.1854e-06	3.80234	361.956	0.00058632	7.1739e-06	2.3067e-06	0.172237	19.6288	71.4341
86	0.247812	86.1495	1166.79	1209.18	0.00980178	0.0453977	0.504897	6.932e-08	1.1106e-06	3.41814	1784.43	0.00056094	7.1739e-06	1.8241e-06	0.151613	18.4835	71.4341
87	0.203625	71.5765	1166.79	1006.43	0.00849437	0.0377352	0.421309	5.4337e-08	9.0869e-07	2.88457	3254	0.00043546	7.1739e-06	1.4484e-06	0.130989	15.1754	71.4341
88	0.159127	55.7317	1166.79	785.802	0.00684346	0.0301657	0.334882	4.1837e-08	7.2333e-07	2.27877	4650.14	0.00032842	7.1739e-06	1.1159e-06	0.110365	12.1953	71.4341
89	0.299471	101.721	1166.79	1439	0.00980178	0.0524625	0.580762	7.487e-08	1.1854e-06	3.80234	361.956	0.00058632	7.1739e-06	2.3067e-06	0.172237	19.6288	71.4341
90	0.299471	101.721	1166.79	1439	0.00980178	0.0524625	0.580762	7.487e-08	1.1854e-06	3.80234	361.956	0.00058632	7.1739e-06	2.3067e-06	0.172237	19.6288	71.4341
91	0.276279	88.4082	1166.79	1327.86	0.00766389	0.0482633	0.528598	7.487e-08	1.0557e-06	3.09703	2415.92	0.00056145	7.1739e-06	2.3067e-06	0.172237	19.6288	71.4341
92	0.222919	59.6542	1166.79	1039.64	0.00336651	0.0399761	0.416995	7.487e-08	8.3987e-07	1.68641	7929.07	0.00050359	7.1739e-06	2.2451e-06	0.172237	19.6288	71.4341
93	0.299471	101.721	1166.79	1439	0.00980178	0.0524625	0.580762	7.487e-08	1.1854e-06	3.80234	361.956	0.00058632	7.1739e-06	2.3067e-06	0.172237	19.6288	71.4341
94	0.271136	95.9243	1166.79	1412.37	0.00980178	0.0483254	0.536526	4.7107e-08	9.7693e-07	3.61834	5322.93	0.00032902	7.1739e-06	1.8818e-06	0.172237	18.652	71.4341
95	0.299471	101.721	1166.79	1439	0.00980178	0.0524625	0.580762	7.487e-08	1.1854e-06	3.80234	361.956	0.00058632	7.1739e-06	2.3067e-06	0.172237	19.6288	71.4341
96	0.276279	88.4082	1166.79	1327.86	0.00766389	0.0482633	0.528598	7.487e-08	1.0557e-06	3.09703	2415.92	0.00056145	7.1739e-06	2.3067e-06	0.172237	19.6288	71.4341
97	0.299471	101.721	1166.79	1439	0.00980178	0.0524625	0.580762	7.487e-08	1.1854e-06	3.80234	361.956	0.00058632	7.1739e-06	2.3067e-06	0.172237	19.6288	71.4341
98	0.299471	101.721	1166.79	1439	0.00980178	0.0524625	0.580762	7.487e-08	1.1854e-06	3.80234	361.956	0.00058632	7.1739e-06	2.3067e-06	0.172237	19.6288	71.4341
99	0.247197	85.3337	1166.79	1197.5	0.00963195	0.0454448	0.503041	7.0767e-08	1.1222e-06	3.3782	1789	0.00057165	7.1739e-06	1.8431e-06	0.151613	18.7374	71.4341
100	0.197105	63.082	1166.79	884.656	0.00674557	0.0382036	0.402029	6.9411e-08	1.0298e-06	2.47109	3311.19	0.00054754	7.1739e-06	1.6437e-06	0.130989	17.7889	71.4341
101	0.299471	101.721	1166.79	1439	0.00980178	0.0524625	0.580762	7.487e-08	1.1854e-06	3.80234	361.956	0.00058632	7.1739e-06	2.3067e-06	0.172237	19.6288	71.4341
102	0.173292	48.2862	396.473	981.703	0.0027035	0.031316	0.326843	3.3871e-08	5.0694e-07	1.14025	9011.72	0.00019471	7.1739e-06	1.6649e-06	0.146058	19.6288	71.4341
103	0.1071	30.5558	299.939	486.6	0.00222684	0.0216788	0.221928	2.1004e-08	3.805e-07	0.981349	12445.9	9.7565e-05	7.1739e-06	9.9275e-07	0.110365	7.59698	71.4341
104	0.299471	101.721	1166.79	1439	0.00980178	0.0524625	0.580762	7.487e-08	1.1854e-06	3.80234	361.956	0.00058632	7.1739e-06	2.3067e-06	0.172237	19.6288	71.4341
105	0.233086	79.3027	906.485	1120.8	0.00789095	0.0415797	0.459142	5.8078e-08	9.3846e-07	2.9972	2234.7	0.00044863	5.573e-06	1.7823e-06	0.141868	15.4914	71.4341
106	0.175516	60.3329	672.9	852.212	0.00632732	0.0321859	0.354465	4.1688e-08	7.1541e-07	2.32128	4182.42	0.00031095	4.2271e-06	1.308e-06	0.116341	11.862	71.4341
107	0.15249	51.9567	525.375	740.984	0.00493778	0.0282707	0.304848	2.8231e-08	5.6459e-07	1.93138	6549.31	0.00017326	4.3991e-06	1.1395e-06	0.109743	9.81874	71.4341
108	0.273099	93.8179	1100.62	1320.96	0.00980178	0.0484494	0.541313	7.2339e-08	1.1312e-06	3.60529	644.423	0.0005834	5.9914e-06	2.0635e-06	0.16018	18.3419	71.4341
109	0.245121	85.2749	1027.37	1194.01	0.00980178	0.0448769	0.501793	6.9707e-08	1.0988e-06	3.39474	1863.7	0.0005704	4.809e-06	1.8089e-06	0.150955	17.8543	71.4341
110	0.187456	65.4719	786.288	915.149	0.00786822	0.0352661	0.392904	5.3332e-08	8.6418e-07	2.65148	3711.45	0.00042981	3.6265e-06	1.3643e-06	0.124707	14.0152	71.4341
111	0.299471	101.721	1166.79	1439	0.00980178	0.0524625	0.580762	7.487e-08	1.1854e-06	3.80234	361.956	0.00058632	7.1739e-06	2.3067e-06	0.172237	19.6288	71.4341
112	0.254783	88.2578	1029.58	1241.54	0.00950099	0.0455729	0.509995	6.6963e-08	1.0665e-06	3.42682	1266.85	0.00053939	5.4789e-06	1.8948e-06	0.152171	17.3504	71.4341
113	0.203083	70.8719	825.304	994.927	0.00803865	0.0372282	0.415915	5.3602e-08	8.7752e-07	2.80508	2933.18	0.00042762	4.2462e-06	1.483e-06	0.129262	14.2819	71.4341
114	0.150471	52.9722	615.808	741.284	0.00647728	0.0287363	0.319721	4.0064e-08	6.8352e-07	2.15812	4751.72	0.00031338	3.03e-06	1.0711e-06	0.106393	11.1067	71.4341
115	0.299471	101.721	1166.79	1439	0.00980178	0.0524625	0.580762	7.487e-08	1.1854e-06	3.80234	361.956	0.00058632	7.1739e-06	2.3067e-06	0.172237	19.6288	71.4341
116	0.254626	86.5917	1023.58	1219.6	0.00888698	0.0452632	0.503811	6.8358e-08	1.055e-06	3.30893	1159.84	0.00054849	5.6984e-06	1.9548e-06	0.151613	16.9804	71.4341
117	0.207955	70.8353	841.203	995.916	0.00756852	0.0377915	0.419094	5.6712e-08	8.8963e-07	2.74683	2648.89	0.000451	4.5711e-06	1.5856e-06	0.130989	14.3261	71.4341
118	0.161207	54.8491	653.078	769.572	0.00612898	0.0300743	0.332774	4.4435e-08	7.0745e-07	2.16264	4211.48	0.00034879	3.514e-06	1.2226e-06	0.110365	11.2057	71.4341
119	0.241066	82.0425	960.697	1156.27	0.00839792	0.0428904	0.47739	6.3393e-08	9.8821e-07	3.13145	1651.74	0.00050487	5.4784e-06	1.8455e-06	0.145321	15.8838	71.4341
120	0.186098	63.4202	730.445	893.823	0.00665042	0.0337338	0.374617	4.7344e-08	7.6193e-07	2.44084	3533.49	0.00036789	4.326e-06	1.4114e-06	0.120728	12.1388	71.4341
121	0.140397	47.4034	506.74	672.251	0.00473656	0.0259207	0.28461	2.9923e-08	5.3068e-07	1.79266	6114.01	0.00020694	3.788e-06	1.0648e-06	0.102733	8.39383	71.4341
122	0.299471	101.721	1166.79	1439	0.00980178	0.0524625	0.580762	7.487e-08	1.1854e-06	3.80234	361.956	0.00058632	7.1739e-06	2.3067e-06	0.172237	19.6288	71.4341
123	0.256378	87.949	986.235	1244.49	0.00872912	0.0455177	0.503337	6.1173e-08	1.0141e-06	3.3186	2087.51	0.00046851	6.1912e-06	1.9342e-06	0.153833	16.9731	56.5775
124	0.199798	69.3687	761.201	980.739	0.00726017	0.0362844	0.401194	4.564e-08	7.9899e-07	2.66465	3895.01	0.00034042	4.8072e-06	1.4662e-06	0.128551	13.4054	41.7208
125	0.141959	50.0618	526.739	707.226	0.00564131	0.0268406	0.296178	2.9551e-08	5.7321e-07	1.97352	6067.22	0.00020568	3.4701e-06	9.9802e-07	0.103835	9.59779	26.8642
126	0.299471	101.721	1166.79	1439	0.00980178	0.0524625	0.580762	7.487e-08	1.1854e-06	3.80234	361.956	0.00058632	7.1739e-06	2.3067e-06	0.172237	19.6288	71.4341
127	0.247624	86.1723	1166.79	1209.84	0.00980178	0.0454138	0.504537	6.8848e-08	1.11e-06	3.41865	1844.62	0.00055538	7.1739e-06	1.8191e-06	0.151613	18.567	71.4341
128	0.203943	72.3917	1166.79	1018.59	0.00865702	0.0377119	0.422563	5.2263e-08	8.9654e-07	2.92357	3336.92	0.00041714	7.1739e-06	1.4229e-06	0.130989	15.0497	71.4341
129	0.159127	55.7317	1166.79	785.802	0.00684346	0.0301657	0.334882	4.1837e-08	7.2333e-07	2.27877	4650.14	0.00032842	7.1739e-06	1.1159e-06	0.110365	12.1953	71.4341
130	0.299471	101.721	1166.79	1439	0.00980178	0.0524625	0.580762	7.487e-08	1.1854e-06	3.80234	361.956	0.00058632	7.1739e-06	2.3067e-06	0.172237	19.6288	71.4341
131	0.299471	101.721	1166.79	1439	0.00980178	0.0524625	0.580762	7.487e-08	1.1854e-06	3.80234	361.956	0.00058632	7.1739e-06	2.3067e-06	0.172237	19.6288	71.4341
132	0.247197	85.3337	1166.79	1197.5	0.00963195	0.0454448	0.503041	7.0767e-08	1.1222e-06	3.3782	1789	0.00057165	7.1739e-06	1.8431e-06	0.151613	18.7374	71.4341
133	0.197105	63.082	1166.79	884.656	0.00674557	0.0382036	0.402029	6.9411e-08	1.0298e-06	2.47109	3311.19	0.00054754	7.1739e-06	1.6437e-06	0.130989	17.7889	71.4341
134	0.247197	85.3337	1166.79	1197.5	0.00963195	0.0454448	0.503041	7.0767e-08	1.1222e-06	3.3782	1789	0.00057165	7.1739e-06	1.8431e-06	0.151613	18.7374	71.4341
135	0.197105	63.082	1166.79	884.656	0.00674557	0.0382036	0.402029	6.9411e-08	1.0298e-06	2.47109	3311.19	0.00054754	7.1739e-06	1.6437e-06	0.130989	17.7889	71.4341
136	0.098726	31.9725	388.266	448.17	0.0037268	0.0208788	0.217466	2.9002e-08	5.0036e-07	1.28931	8192.42	0.00019461	7.1739e-06	7.8871e-07	0.0899492	8.39383	71.4341
137	0.100962	33.7767	391.201	473.714	0.0040644	0.0209806	0.22287	2.7072e-08	4.8636e-07	1.37392	8058.97	0.00018168	7.1739e-06	7.6588e-07	0.0902147	8.04261	26.8642
138	0.0968315	29.6794	272.54	426.613	0.00258863	0.0202086	0.209767	1.4297e-08	3.2942e-07	1.0783	14616	3.6605e-05	3.7066e-06	8.0145e-07	0.109345	4.64885	71.4341
139	0.0968315	29.6794	272.54	426.613	0.00258863	0.0202086	0.209767	1.4297e-08	3.2942e-07	1.0783	14616	3.6605e-05	3.7066e-06	8.0145e-07	0.109345	4.64885	41.7208
140	0.0968315	29.6794	272.54	426.613	0.00258863	0.0202086	0.209767	1.4297e-08	3.2942e-07	1.0783	14616	3.6605e-05	3.7066e-06	8.0145e-07	0.109345	4.64885	26.8642
141	0.0871044	27.9826	270.562	395.873	0.00351969	0.0205739	0.211442	1.5594e-08	3.9415e-07	1.15913	16950.6	4.7177e-05	2.9043e-06	6.5931e-07	0.114942	6.13089	15.1687
142	0.0907593	25.9203	296.793	367.198	0.00260633	0.0207859	0.209024	2.291e-08	4.1814e-07	0.997523	16096.8	0.00011109	3.1872e-06	8.1666e-07	0.114745	6.05808	23.6507
143	0.0894403	27.2314	261.122	387.912	0.00295227	0.0206236	0.210439	1.5514e-08	3.6914e-07	1.06834	17661.5	4.0404e-05	3.31e-06	7.313e-07	0.118407	5.36604	15.286
144	0.0907593	25.9203	296.793	367.198	0.00260633	0.0207859	0.209024	2.291e-08	4.1814e-07	0.997523	16096.8	0.00011109	3.1872e-06	8.1666e-07	0.114745	6.05808	23.6507
145	0.093351	28.304	280.878	406.749	0.00226604	0.0190047	0.195169	1.6811e-08	3.3846e-07	1.00454	11317.5	6.8297e-05	3.4406e-06	7.9768e-07	0.0951823	5.20153	16.721
146	0.0931141	29.009	268.739	417.516	0.00243581	0.0189788	0.19624	1.3954e-08	3.2131e-07	1.04133	11808.7	4.1308e-05	3.4793e-06	7.6333e-07	0.0963066	4.99639	13.4489
147	0.093351	28.304	280.878	406.749	0.00226604	0.0190047	0.195169	1.6811e-08	3.3846e-07	1.00454	11317.5	6.8297e-05	3.4406e-06	7.9768e-07	0.0951823	5.20153	16.721
148	0.0931129	29.2014	266.5	420.377	0.00248398	0.0189908	0.196673	1.3347e-08	3.1831e-07	1.05175	11915.4	3.5576e-05	3.4846e-06	7.5544e-07	0.0965867	4.96972	12.7424
149	0.0931129	29.2014	266.5	420.377	0.00248398	0.0189908	0.196673	1.3347e-08	3.1831e-07	1.05175	11915.4	3.5576e-05	3.4846e-06	7.5544e-07	0.0965867	4.96972	12.7424
150	0.0937574	27.4133	293.755	392.386	0.00222588	0.0196404	0.199721	2.0253e-08	3.6972e-07	0.981098	12456.3	9.5826e-05	3.4123e-06	8.3576e-07	0.100812	5.49844	20.6124
151	0.299471	101.721	1166.79	1439	0.00980178	0.0524625	0.580762	7.487e-08	1.1854e-06	3.80234	361.956	0.00058632	7.1739e-06	2.3067e-06	0.172237	19.6288	71.4341
152	0.0931129	29.2014	266.5	420.377	0.00248398	0.0189908	0.196673	1.3347e-08	3.1831e-07	1.05175	11915.4	3.5576e-05	3.4846e-06	7.5544e-07	0.0965867	4.96972	12.7424
153	0.0931129	29.2014	266.5	420.377	0.00248398	0.0189908	0.196673	1.3347e-08	3.1831e-07	1.05175	11915.4	3.5576e-05	3.4846e-06	7.5544e-07	0.0965867	4.96972	12.7424
154	0.0971168	30.6806	386.048	430.007	0.00348901	0.0208013	0.213601	3.0051e-08	5.0983e-07	1.22904	8286.2	0.00020348	2.444e-06	8.0459e-07	0.0897406	8.63396	30.598
155	0.0968305	29.6791	272.538	426.608	0.00258862	0.0202085	0.209766	1.4297e-08	3.2942e-07	1.07829	14616.1	3.6604e-05	3.7065e-06	8.0144e-07	0.109345	4.64885	14.2199
156	0.133464	44.3944	390.705	640.665	0.00357121	0.0246069	0.262986	1.5925e-08	3.9845e-07	1.56319	9504.88	5.1539e-05	4.7052e-06	1.018e-06	0.107787	6.70268	12.0076

## Sheet: SOL_full_future
Table S7
Caption:	Initial Pareto-optimal solutions generated in the full objective space that serve as input for the objective reduction in the ‘future’ scenario.
#	acidification	GWI	ecotoxicity_freshwater	energy_resources_non_renewable	eutrophication_freshwater	eutrophication_marine	eutrophication_terrestrial	human_toxicity_carcinogenic	human_toxicity_non_carcinogenic	ionising_radiation_human_health	land_use	resources_metals_minerals	ozone_depletion	particulate_matter_formation	photochemical_ozone_formation_human_health	water_use	C
1	0.0274193	5.67506	118.31	75.1993	0.00103554	0.00913316	0.0818777	1.5291e-08	2.5167e-07	0.29248	9913.77	8.5392e-05	1.1123e-06	3.1114e-07	0.0570247	4.00322	93.3478
2	0.0292303	5.83977	137.881	76.8207	0.00093709	0.00905203	0.0817395	1.812e-08	2.6428e-07	0.285077	8522.8	0.00011661	1.1123e-06	3.4841e-07	0.0531696	4.09916	93.3478
3	0.0354312	6.68203	187.453	86.759	0.00083865	0.00968574	0.089297	2.5103e-08	3.0817e-07	0.297009	6768.99	0.00018715	1.1123e-06	4.5229e-07	0.0511816	4.47199	93.3478
4	0.0402005	7.38551	223.393	95.3137	0.00079844	0.0103527	0.0962413	3.0134e-08	3.4531e-07	0.312339	5813.89	0.00023585	1.1123e-06	5.2854e-07	0.0511187	4.89348	93.3478
5	0.0618533	10.7541	377.553	136.956	0.00074753	0.0139492	0.132102	5.1576e-08	5.1922e-07	0.403399	3056.51	0.00043666	1.1123e-06	8.6147e-07	0.0567141	7.02295	93.3478
6	0.0273577	5.7782	110.775	76.8629	0.00113281	0.00949422	0.0850446	1.412e-08	2.5147e-07	0.307378	11146.2	7.002e-05	9.465e-07	3.0054e-07	0.0615719	4.01568	93.3478
7	0.0273422	5.70069	115.148	75.6467	0.00107065	0.00924713	0.0829362	1.4795e-08	2.5064e-07	0.297491	10372.5	7.9379e-05	8.6362e-07	3.0652e-07	0.0586779	3.98219	93.3478
8	0.0273544	5.69827	115.586	75.5951	0.00106589	0.00923187	0.082795	1.4876e-08	2.508e-07	0.296844	10310	8.0208e-05	1.1123e-06	3.0715e-07	0.0584537	3.98536	93.3478
9	0.0275229	5.63811	122.65	74.5692	0.00098719	0.00897597	0.0804171	1.5952e-08	2.5305e-07	0.28553	9282.62	9.3651e-05	1.1123e-06	3.1749e-07	0.0547486	4.03169	93.3478
10	0.0273599	5.77932	110.78	76.8743	0.00113293	0.00949506	0.0850517	1.4131e-08	2.515e-07	0.307427	11147.3	7.002e-05	1.1123e-06	3.0055e-07	0.0615773	4.01627	33.641
11	0.0354263	6.68007	187.424	86.741	0.00083865	0.0096851	0.0892897	2.5079e-08	3.0813e-07	0.296949	6769.6	0.00018711	7.8128e-07	4.5224e-07	0.0511807	4.47138	93.3478
12	0.0401609	7.3625	223.07	94.9556	0.00079474	0.0102971	0.0960992	3.0069e-08	3.4239e-07	0.311064	5813.89	0.00023618	7.907e-07	5.2842e-07	0.051091	4.78749	93.3478
13	0.0618483	10.7499	377.511	136.893	0.00074688	0.0139399	0.132081	5.1559e-08	5.1871e-07	0.403168	3056.51	0.00043673	9.2125e-07	8.6149e-07	0.0567109	7.00425	93.3478
14	0.0276801	5.5958	123.522	73.717	0.0009715	0.00879644	0.0803761	1.6054e-08	2.4328e-07	0.281735	9250.53	9.7938e-05	8.0846e-07	3.2183e-07	0.0547486	3.61455	93.3478
15	0.0277298	5.58634	122.99	73.4914	0.00097506	0.0087525	0.080678	1.5967e-08	2.3874e-07	0.281606	9371.91	9.806e-05	8.1341e-07	3.224e-07	0.0552391	3.42698	33.641
16	0.0275357	5.63641	117.511	74.4058	0.00103554	0.00898075	0.0823311	1.5141e-08	2.3969e-07	0.290601	10115	8.7009e-05	8.4887e-07	3.1336e-07	0.057865	3.51017	93.3478
17	0.0292258	5.83792	137.856	76.8038	0.00093709	0.00905145	0.0817328	1.8097e-08	2.6424e-07	0.285021	8523.36	0.00011658	7.9426e-07	3.4837e-07	0.0531688	4.09861	93.3478
18	0.0354263	6.68007	187.424	86.741	0.00083865	0.0096851	0.0892897	2.5079e-08	3.0813e-07	0.296949	6769.6	0.00018711	7.8128e-07	4.5224e-07	0.0511807	4.47138	93.3478
19	0.0273274	5.73113	109.231	76.0367	0.00113398	0.00935936	0.0852257	1.3884e-08	2.4123e-07	0.305572	11328.6	7.002e-05	9.0781e-07	3.0031e-07	0.0622332	3.62188	93.3478
20	0.0273274	5.73113	109.231	76.0367	0.00113398	0.00935936	0.0852257	1.3884e-08	2.4123e-07	0.305572	11328.6	7.002e-05	9.0781e-07	3.0031e-07	0.0622332	3.62188	93.3478
21	0.0290578	5.81816	136.525	76.588	0.00094046	0.00904387	0.0815418	1.791e-08	2.6357e-07	0.284903	8571.27	0.00011454	7.9481e-07	3.4546e-07	0.053224	4.10878	93.3478
22	0.0401609	7.3625	223.07	94.9556	0.00079474	0.0102971	0.0960992	3.0069e-08	3.4239e-07	0.311064	5813.89	0.00023618	7.907e-07	5.2842e-07	0.051091	4.78749	93.3478
23	0.0273274	5.73113	109.231	76.0367	0.00113398	0.00935936	0.0852257	1.3884e-08	2.4123e-07	0.305572	11328.6	7.002e-05	9.0781e-07	3.0031e-07	0.0622332	3.62188	93.3478
24	0.0273274	5.73113	109.231	76.0367	0.00113398	0.00935936	0.0852257	1.3884e-08	2.4123e-07	0.305572	11328.6	7.002e-05	9.0781e-07	3.0031e-07	0.0622332	3.62188	93.3478
25	0.027348	5.69809	115.147	75.596	0.00107008	0.00923719	0.08294	1.4794e-08	2.5003e-07	0.297308	10375.6	7.9546e-05	8.6362e-07	3.0668e-07	0.0586941	3.95699	93.3478
26	0.0273274	5.73113	109.231	76.0367	0.00113398	0.00935936	0.0852257	1.3884e-08	2.4123e-07	0.305572	11328.6	7.002e-05	9.0781e-07	3.0031e-07	0.0622332	3.62188	93.3478
27	0.0273233	5.73249	109.335	76.0671	0.00113328	0.0093647	0.0851825	1.3901e-08	2.4184e-07	0.305564	11309.6	7.006e-05	9.0703e-07	3.003e-07	0.0621588	3.64678	93.3478
28	0.0273524	5.69704	115.575	75.5845	0.00106589	0.00923164	0.0827922	1.486e-08	2.5078e-07	0.296805	10310.3	8.0192e-05	8.6067e-07	3.0714e-07	0.0584537	3.98499	93.3478
29	0.0275204	5.63663	122.638	74.5564	0.00098719	0.00897569	0.0804138	1.5932e-08	2.5303e-07	0.285484	9283	9.3632e-05	8.1192e-07	3.1748e-07	0.0547486	4.03125	93.3478
30	0.0273274	5.73113	109.231	76.0367	0.00113398	0.00935936	0.0852257	1.3884e-08	2.4123e-07	0.305572	11328.6	7.002e-05	9.0781e-07	3.0031e-07	0.0622332	3.62188	33.641
31	0.0292258	5.83792	137.856	76.8038	0.00093709	0.00905145	0.0817328	1.8097e-08	2.6424e-07	0.285021	8523.36	0.00011658	7.9426e-07	3.4837e-07	0.0531688	4.09861	93.3478
32	0.0354263	6.68007	187.424	86.741	0.00083865	0.0096851	0.0892897	2.5079e-08	3.0813e-07	0.296949	6769.6	0.00018711	7.8128e-07	4.5224e-07	0.0511807	4.47138	93.3478
33	0.0290622	5.81603	136.539	76.5471	0.00093986	0.0090358	0.0815385	1.7912e-08	2.6312e-07	0.284738	8571.27	0.00011469	7.9469e-07	3.4561e-07	0.0532273	4.09003	93.3478
34	0.0618483	10.7499	377.511	136.893	0.00074688	0.0139399	0.132081	5.1559e-08	5.1871e-07	0.403168	3056.51	0.00043673	9.2125e-07	8.6149e-07	0.0567109	7.00425	93.3478
35	0.0277298	5.58634	122.99	73.4914	0.00097506	0.0087525	0.080678	1.5967e-08	2.3874e-07	0.281606	9371.91	9.806e-05	8.1341e-07	3.224e-07	0.0552391	3.42698	93.3478
36	0.0277298	5.58634	122.99	73.4914	0.00097506	0.0087525	0.080678	1.5967e-08	2.3874e-07	0.281606	9371.91	9.806e-05	8.1341e-07	3.224e-07	0.0552391	3.42698	93.3478
37	0.0277298	5.58634	122.99	73.4914	0.00097506	0.0087525	0.080678	1.5967e-08	2.3874e-07	0.281606	9371.91	9.806e-05	8.1341e-07	3.224e-07	0.0552391	3.42698	93.3478
38	0.0276801	5.5958	123.522	73.717	0.0009715	0.00879644	0.0803761	1.6054e-08	2.4328e-07	0.281735	9250.53	9.7938e-05	8.0846e-07	3.2183e-07	0.0547486	3.61455	93.3478
39	0.0276801	5.5958	123.522	73.717	0.0009715	0.00879644	0.0803761	1.6054e-08	2.4328e-07	0.281735	9250.53	9.7938e-05	8.0846e-07	3.2183e-07	0.0547486	3.61455	93.3478
40	0.0277298	5.58634	122.99	73.4914	0.00097506	0.0087525	0.080678	1.5967e-08	2.3874e-07	0.281606	9371.91	9.806e-05	8.1341e-07	3.224e-07	0.0552391	3.42698	33.641
41	0.0883579	14.9619	562.811	189.308	0.00074028	0.0186243	0.177761	7.7288e-08	7.369e-07	0.524324	299.13	0.00067386	1.1123e-06	1.2634e-06	0.0658639	9.8215	93.3478
42	0.0461623	9.35673	562.811	179.571	0.00113398	0.0112204	0.107471	3.0813e-08	3.013e-07	0.374927	8244.01	0.00016238	1.1123e-06	5.2209e-07	0.0658639	6.21768	93.3478
43	0.0883579	14.9619	562.811	189.308	0.00074028	0.0186243	0.177761	7.7288e-08	7.369e-07	0.524324	299.13	0.00067386	1.1123e-06	1.2634e-06	0.0658639	9.8215	93.3478
44	0.0883579	14.9619	562.811	189.308	0.00074028	0.0186243	0.177761	7.7288e-08	7.369e-07	0.524324	299.13	0.00067386	1.1123e-06	1.2634e-06	0.0658639	9.8215	93.3478
45	0.0577692	10.9068	562.811	189.308	0.00077983	0.0126744	0.123258	3.6911e-08	3.8752e-07	0.342286	5132.67	0.00030036	1.1123e-06	7.37e-07	0.0609226	6.79853	93.3478
46	0.0883579	14.9619	562.811	189.308	0.00074028	0.0186243	0.177761	7.7288e-08	7.369e-07	0.524324	299.13	0.00067386	1.1123e-06	1.2634e-06	0.0658639	9.8215	93.3478
47	0.0883579	14.9619	562.811	189.308	0.00074028	0.0186243	0.177761	7.7288e-08	7.369e-07	0.524324	299.13	0.00067386	1.1123e-06	1.2634e-06	0.0658639	9.8215	93.3478
48	0.0883579	14.9619	562.811	189.308	0.00074028	0.0186243	0.177761	7.7288e-08	7.369e-07	0.524324	299.13	0.00067386	1.1123e-06	1.2634e-06	0.0658639	9.8215	93.3478
49	0.0794501	13.8437	481.759	189.308	0.00074912	0.0170543	0.162073	6.615e-08	6.4731e-07	0.472867	1498.11	0.00056824	1.0294e-06	1.114e-06	0.0638267	9.30098	93.3478
50	0.0708552	12.7283	402.165	189.308	0.00074794	0.0153776	0.14676	5.5212e-08	5.5078e-07	0.41939	2694.32	0.00046693	9.465e-07	9.7037e-07	0.0620121	8.45826	93.3478
51	0.0618736	11.5738	318.988	189.308	0.00075342	0.0136746	0.130958	4.3775e-08	4.519e-07	0.365049	3997.41	0.00036034	8.6362e-07	8.198e-07	0.0603127	7.64049	93.3478
52	0.0506987	10.5273	562.811	189.308	0.00105989	0.0127029	0.11843	2.3449e-08	3.4902e-07	0.406147	8194.7	0.00017493	1.1123e-06	5.4102e-07	0.0658639	9.8215	93.3478
53	0.0774079	13.2905	562.811	169.928	0.00076585	0.0169258	0.15894	6.6329e-08	6.5888e-07	0.480435	1503.76	0.00056909	1.1123e-06	1.0908e-06	0.0621588	9.23751	93.3478
54	0.05515	9.68333	562.811	126.876	0.00077296	0.0128168	0.119867	4.3865e-08	4.6396e-07	0.377543	3982.04	0.00036454	1.1123e-06	7.4551e-07	0.0547486	6.62964	93.3478
55	0.0883579	14.9619	562.811	189.308	0.00074028	0.0186243	0.177761	7.7288e-08	7.369e-07	0.524324	299.13	0.00067386	1.1123e-06	1.2634e-06	0.0658639	9.8215	93.3478
56	0.0807046	13.6901	562.811	176.829	0.00077169	0.0170572	0.165539	6.8576e-08	6.4929e-07	0.490283	1833.94	0.00059713	1.1123e-06	1.139e-06	0.0658639	8.18498	93.3478
57	0.0439705	8.50227	562.811	150.833	0.00113398	0.0108828	0.105074	3.4594e-08	3.0335e-07	0.36951	8356.12	0.00017442	1.1123e-06	5.1321e-07	0.0658639	4.91195	93.3478
58	0.0581807	11.4452	562.811	189.308	0.00113398	0.0131346	0.127558	4.2705e-08	3.9493e-07	0.465499	6001.19	0.00027146	1.1123e-06	6.765e-07	0.0658639	9.8215	33.641
59	0.0618498	10.7508	377.517	136.902	0.0007469	0.0139401	0.132084	5.1571e-08	5.1873e-07	0.4032	3056.51	0.00043674	1.1123e-06	8.615e-07	0.0567118	7.00453	93.3478
60	0.0883579	14.9619	562.811	189.308	0.00074028	0.0186243	0.177761	7.7288e-08	7.369e-07	0.524324	299.13	0.00067386	1.1123e-06	1.2634e-06	0.0658639	9.8215	93.3478
61	0.0883579	14.9619	562.811	189.308	0.00074028	0.0186243	0.177761	7.7288e-08	7.369e-07	0.524324	299.13	0.00067386	1.1123e-06	1.2634e-06	0.0658639	9.8215	93.3478
62	0.0883579	14.9619	562.811	189.308	0.00074028	0.0186243	0.177761	7.7288e-08	7.369e-07	0.524324	299.13	0.00067386	1.1123e-06	1.2634e-06	0.0658639	9.8215	93.3478
63	0.0883579	14.9619	562.811	189.308	0.00074028	0.0186243	0.177761	7.7288e-08	7.369e-07	0.524324	299.13	0.00067386	1.1123e-06	1.2634e-06	0.0658639	9.8215	93.3478
64	0.0883579	14.9619	562.811	189.308	0.00074028	0.0186243	0.177761	7.7288e-08	7.369e-07	0.524324	299.13	0.00067386	1.1123e-06	1.2634e-06	0.0658639	9.8215	93.3478
65	0.0883579	14.9619	562.811	189.308	0.00074028	0.0186243	0.177761	7.7288e-08	7.369e-07	0.524324	299.13	0.00067386	1.1123e-06	1.2634e-06	0.0658639	9.8215	93.3478
66	0.0883579	14.9619	562.811	189.308	0.00074028	0.0186243	0.177761	7.7288e-08	7.369e-07	0.524324	299.13	0.00067386	1.1123e-06	1.2634e-06	0.0658639	9.8215	93.3478
67	0.0883579	14.9619	562.811	189.308	0.00074028	0.0186243	0.177761	7.7288e-08	7.369e-07	0.524324	299.13	0.00067386	1.1123e-06	1.2634e-06	0.0658639	9.8215	93.3478
68	0.0667644	12.2253	562.811	189.308	0.00079636	0.0149659	0.139698	4.9615e-08	5.2592e-07	0.408633	3495.18	0.0004098	9.465e-07	8.9011e-07	0.06158	8.8788	93.3478
69	0.0584942	11.1811	426.628	189.308	0.00079806	0.0134019	0.125376	3.9273e-08	4.3483e-07	0.357437	4668.87	0.00031328	8.6362e-07	7.5426e-07	0.0600453	8.08581	93.3478
70	0.0883579	14.9619	562.811	189.308	0.00074028	0.0186243	0.177761	7.7288e-08	7.369e-07	0.524324	299.13	0.00067386	1.1123e-06	1.2634e-06	0.0658639	9.8215	93.3478
71	0.0479017	9.93071	562.811	174.792	0.00113398	0.0136097	0.115851	2.6709e-08	4.2503e-07	0.398003	8498.23	0.0001732	1.1123e-06	5.4102e-07	0.0658639	9.8215	93.3478
72	0.0760925	13.1595	562.811	168.805	0.00079153	0.0169417	0.157243	6.4945e-08	6.5955e-07	0.480537	1769.13	0.0005526	1.1123e-06	1.0674e-06	0.0621588	9.56208	93.3478
73	0.0651797	11.387	562.811	147.63	0.000793	0.0149146	0.138026	5.3948e-08	5.6361e-07	0.429708	2964.8	0.00045264	1.1123e-06	8.9836e-07	0.0584537	8.26875	93.3478
74	0.0538099	9.54259	562.811	125.607	0.00079752	0.0128105	0.118109	4.245e-08	4.6342e-07	0.377172	4252.29	0.00034804	1.1123e-06	7.2193e-07	0.0547486	6.91227	93.3478
75	0.0807046	13.6901	562.811	176.829	0.00077169	0.0170572	0.165539	6.8576e-08	6.4929e-07	0.490283	1833.94	0.00059713	1.1123e-06	1.139e-06	0.0658639	8.18498	93.3478
76	0.0883579	14.9619	562.811	189.308	0.00074028	0.0186243	0.177761	7.7288e-08	7.369e-07	0.524324	299.13	0.00067386	1.1123e-06	1.2634e-06	0.0658639	9.8215	93.3478
77	0.0883579	14.9619	562.811	189.308	0.00074028	0.0186243	0.177761	7.7288e-08	7.369e-07	0.524324	299.13	0.00067386	1.1123e-06	1.2634e-06	0.0658639	9.8215	93.3478
78	0.0668438	12.2327	562.811	189.308	0.00079492	0.0149675	0.139805	4.9712e-08	5.2611e-07	0.408725	3477.16	0.00041089	9.465e-07	8.9158e-07	0.0615726	8.86307	93.3478
79	0.0583028	11.0644	535.95	189.308	0.00078138	0.0131067	0.124021	3.8515e-08	4.1942e-07	0.35171	4667.81	0.00031003	8.6362e-07	7.4742e-07	0.0596672	7.70224	93.3478
80	0.0883579	14.9619	562.811	189.308	0.00074028	0.0186243	0.177761	7.7288e-08	7.369e-07	0.524324	299.13	0.00067386	1.1123e-06	1.2634e-06	0.0658639	9.8215	93.3478
81	0.0506597	10.4432	562.811	180.333	0.00113398	0.0124312	0.117848	2.8203e-08	3.429e-07	0.430412	7933.48	0.00018264	1.1123e-06	5.4102e-07	0.0658639	9.8215	93.3478
82	0.0883579	14.9619	562.811	189.308	0.00074028	0.0186243	0.177761	7.7288e-08	7.369e-07	0.524324	299.13	0.00067386	1.1123e-06	1.2634e-06	0.0658639	9.8215	93.3478
83	0.0772678	13.2788	562.811	169.847	0.00076908	0.0169345	0.158768	6.6183e-08	6.5933e-07	0.480593	1532.04	0.00056724	1.1123e-06	1.0882e-06	0.0621588	9.28694	93.3478
84	0.0883579	14.9619	562.811	189.308	0.00074028	0.0186243	0.177761	7.7288e-08	7.369e-07	0.524324	299.13	0.00067386	1.1123e-06	1.2634e-06	0.0658639	9.8215	93.3478
85	0.078553	13.3906	562.811	173.416	0.00084945	0.0167034	0.161619	6.9958e-08	6.3557e-07	0.497212	2012.18	0.00057484	1.1123e-06	1.1046e-06	0.0658639	8.18498	93.3478
86	0.0278416	5.62044	124.013	74.0014	0.00097079	0.00884003	0.0806876	1.6079e-08	2.4472e-07	0.281773	9225.17	9.8043e-05	1.1123e-06	3.2511e-07	0.0547486	3.6571	93.3478
87	0.0421142	9.23517	125.289	189.308	0.00097587	0.0108392	0.103345	1.6823e-08	2.4548e-07	0.281903	9365.86	9.8271e-05	1.1123e-06	4.7154e-07	0.0658639	6.04751	33.641
88	0.0883579	14.9619	562.811	189.308	0.00074028	0.0186243	0.177761	7.7288e-08	7.369e-07	0.524324	299.13	0.00067386	1.1123e-06	1.2634e-06	0.0658639	9.8215	93.3478
89	0.0715655	12.3145	445.616	156.47	0.00074831	0.0157215	0.148882	6.1017e-08	6.0242e-07	0.448865	2033.13	0.0005229	9.9192e-07	1.0083e-06	0.0600175	8.1829	93.3478
90	0.0546557	9.60853	326.943	122.691	0.00075181	0.0126741	0.119802	4.4533e-08	4.5902e-07	0.370694	3852.46	0.00037194	8.7164e-07	7.5216e-07	0.0544058	6.22086	93.3478
91	0.0387224	7.16473	212.318	92.6936	0.00080866	0.0101362	0.0940136	2.8567e-08	3.3361e-07	0.307121	6084.34	0.00022098	7.8728e-07	5.0509e-07	0.0510435	4.76055	93.3478
92	0.0883579	14.9619	562.811	189.308	0.00074028	0.0186243	0.177761	7.7288e-08	7.369e-07	0.524324	299.13	0.00067386	1.1123e-06	1.2634e-06	0.0658639	9.8215	93.3478
93	0.076789	13.1433	482.139	166.778	0.00074661	0.0166409	0.157873	6.6089e-08	6.4526e-07	0.472647	1487.21	0.00056969	1.0294e-06	1.0875e-06	0.0618114	8.73198	93.3478
94	0.0653966	11.3135	402.356	143.907	0.00074555	0.0145662	0.138179	5.5009e-08	5.4799e-07	0.41933	2680.5	0.00046854	9.465e-07	9.1533e-07	0.0579102	7.38436	93.3478
95	0.0534819	9.42233	318.68	120.374	0.00075273	0.0124678	0.117803	4.3385e-08	4.4926e-07	0.365409	3984.09	0.00036135	8.6362e-07	7.3431e-07	0.0540361	6.09237	93.3478
96	0.0883579	14.9619	562.811	189.308	0.00074028	0.0186243	0.177761	7.7288e-08	7.369e-07	0.524324	299.13	0.00067386	1.1123e-06	1.2634e-06	0.0658639	9.8215	93.3478
97	0.0725114	12.4665	452.241	158.371	0.00074843	0.0158941	0.150518	6.1937e-08	6.1051e-07	0.4533	1934.04	0.0005313	9.9881e-07	1.0226e-06	0.0603413	8.29562	93.3478
98	0.0566053	9.91784	340.66	126.54	0.00075037	0.013017	0.123127	4.6439e-08	4.7522e-07	0.379483	3635.11	0.00038952	8.8501e-07	7.818e-07	0.0550246	6.43384	93.3478
99	0.0409523	7.47838	228.937	96.3577	0.00078875	0.0104053	0.0972817	3.0889e-08	3.4817e-07	0.313644	5670.2	0.00024417	7.931e-07	5.4102e-07	0.0511358	4.84268	93.3478
100	0.0778199	13.3198	489.421	169.04	0.00074906	0.016863	0.159697	6.7101e-08	6.5595e-07	0.478189	1377.92	0.0005784	1.0375e-06	1.1028e-06	0.0621588	8.9282	93.3478
101	0.0669981	11.5803	413.626	147.29	0.00074776	0.0148878	0.140984	5.6575e-08	5.6332e-07	0.427451	2511.62	0.00048237	9.5866e-07	9.3927e-07	0.0584537	7.63863	93.3478
102	0.0557392	9.78042	334.568	124.83	0.00075099	0.0128647	0.121649	4.5592e-08	4.6802e-07	0.375576	3731.35	0.00038171	8.7905e-07	7.6864e-07	0.0547486	6.33934	93.3478
103	0.0883579	14.9619	562.811	189.308	0.00074028	0.0186243	0.177761	7.7288e-08	7.369e-07	0.524324	299.13	0.00067386	1.1123e-06	1.2634e-06	0.0658639	9.8215	93.3478
104	0.0802669	13.6196	501.875	172.212	0.00076806	0.017025	0.165074	6.8762e-08	6.5039e-07	0.487685	1794.85	0.00059845	1.0796e-06	1.1388e-06	0.065515	8.18498	93.3478
105	0.0666125	11.433	405.607	144.898	0.00077462	0.0145605	0.141744	5.5383e-08	5.3326e-07	0.424896	3333.27	0.00047605	9.8549e-07	9.3168e-07	0.0612425	6.54846	93.3478
106	0.0515222	9.04053	299.456	115.134	0.00078606	0.0119115	0.116017	4.0634e-08	4.082e-07	0.356968	5014.1	0.00033994	8.82e-07	7.0218e-07	0.056447	4.91195	93.3478
107	0.0883579	14.9619	562.811	189.308	0.00074028	0.0186243	0.177761	7.7288e-08	7.369e-07	0.524324	299.13	0.00067386	1.1123e-06	1.2634e-06	0.0658639	9.8215	93.3478
108	0.0766826	13.1375	481.321	166.758	0.00075031	0.0166571	0.157782	6.5974e-08	6.4595e-07	0.473023	1518.84	0.00056811	1.0302e-06	1.0855e-06	0.0618506	8.78248	73.4455
109	0.0591679	10.3261	358.411	131.622	0.00075155	0.0134737	0.127608	4.8901e-08	4.9608e-07	0.391436	3395.3	0.00041217	9.0473e-07	8.2048e-07	0.0560092	6.69748	53.5432
110	0.0432798	7.83328	245.263	100.702	0.00078362	0.0107696	0.101182	3.3158e-08	3.6511e-07	0.323163	5407.09	0.00026579	8.0806e-07	5.7683e-07	0.051862	5.00291	33.641
111	0.0875864	14.8583	558.441	188.256	0.00075139	0.0185402	0.176623	7.7288e-08	7.3246e-07	0.523072	439.713	0.00066548	1.1123e-06	1.2506e-06	0.0658639	9.8215	93.3478
112	0.0576658	11.0508	484.183	189.308	0.00080231	0.0132264	0.123688	3.7978e-08	4.2463e-07	0.353461	4836.87	0.00030158	8.6362e-07	7.3727e-07	0.059927	8.01521	93.3478
113	0.0883579	14.9619	562.811	189.308	0.00074028	0.0186243	0.177761	7.7288e-08	7.369e-07	0.524324	299.13	0.00067386	1.1123e-06	1.2634e-06	0.0658639	9.8215	93.3478
114	0.0485455	10.0624	562.811	177.429	0.00113398	0.0133394	0.116214	2.7087e-08	4.059e-07	0.404429	8354.2	0.0001743	1.1123e-06	5.4102e-07	0.0658639	9.8215	93.3478
115	0.0883579	14.9619	562.811	189.308	0.00074028	0.0186243	0.177761	7.7288e-08	7.369e-07	0.524324	299.13	0.00067386	1.1123e-06	1.2634e-06	0.0658639	9.8215	93.3478
116	0.0759687	13.146	562.811	168.68	0.0007937	0.0169398	0.157079	6.4814e-08	6.5942e-07	0.480474	1794.08	0.00055109	1.1123e-06	1.0652e-06	0.0621588	9.58528	93.3478
117	0.0650798	11.3758	562.811	147.524	0.00079468	0.014912	0.137892	5.3842e-08	5.6346e-07	0.429635	2984.93	0.00045144	1.1123e-06	8.9662e-07	0.0584537	8.28519	93.3478
118	0.0537432	9.53506	562.811	125.535	0.00079863	0.0128086	0.118019	4.2379e-08	4.633e-07	0.377119	4265.75	0.00034724	1.1123e-06	7.2076e-07	0.0547486	6.92291	93.3478
119	0.0883579	14.9619	562.811	189.308	0.00074028	0.0186243	0.177761	7.7288e-08	7.369e-07	0.524324	299.13	0.00067386	1.1123e-06	1.2634e-06	0.0658639	9.8215	93.3478
120	0.078553	13.3906	562.811	173.416	0.00084945	0.0167034	0.161619	6.9958e-08	6.3557e-07	0.497212	2012.18	0.00057484	1.1123e-06	1.1046e-06	0.0658639	8.18498	93.3478
121	0.0883579	14.9619	562.811	189.308	0.00074028	0.0186243	0.177761	7.7288e-08	7.369e-07	0.524324	299.13	0.00067386	1.1123e-06	1.2634e-06	0.0658639	9.8215	93.3478
122	0.061213	11.6674	562.811	188.947	0.00113398	0.014936	0.133431	5.2492e-08	5.2209e-07	0.460293	5093.05	0.00033256	1.1123e-06	7.818e-07	0.0658639	9.8215	93.3478
123	0.0506296	10.4069	562.811	176.853	0.00113398	0.0124318	0.118088	2.8111e-08	3.4369e-07	0.432958	7970.7	0.00018534	1.1123e-06	5.4102e-07	0.0658639	9.8215	93.3478
124	0.0883579	14.9619	562.811	189.308	0.00074028	0.0186243	0.177761	7.7288e-08	7.369e-07	0.524324	299.13	0.00067386	1.1123e-06	1.2634e-06	0.0658639	9.8215	93.3478
125	0.0772678	13.2788	562.811	169.847	0.00076908	0.0169345	0.158768	6.6183e-08	6.5933e-07	0.480593	1532.04	0.00056724	1.1123e-06	1.0882e-06	0.0621588	9.28694	93.3478
126	0.0883579	14.9619	562.811	189.308	0.00074028	0.0186243	0.177761	7.7288e-08	7.369e-07	0.524324	299.13	0.00067386	1.1123e-06	1.2634e-06	0.0658639	9.8215	93.3478
127	0.0805239	13.6649	562.811	176.54	0.00077842	0.017027	0.165207	6.8706e-08	6.4813e-07	0.490909	1847.98	0.00059526	1.1123e-06	1.1361e-06	0.0658639	8.18498	93.3478
128	0.0883579	14.9619	562.811	189.308	0.00074028	0.0186243	0.177761	7.7288e-08	7.369e-07	0.524324	299.13	0.00067386	1.1123e-06	1.2634e-06	0.0658639	9.8215	93.3478
129	0.0883579	14.9619	562.811	189.308	0.00074028	0.0186243	0.177761	7.7288e-08	7.369e-07	0.524324	299.13	0.00067386	1.1123e-06	1.2634e-06	0.0658639	9.8215	93.3478
130	0.0760925	13.1595	562.811	168.805	0.00079153	0.0169417	0.157243	6.4945e-08	6.5955e-07	0.480537	1769.13	0.0005526	1.1123e-06	1.0674e-06	0.0621588	9.56208	93.3478
131	0.0651797	11.387	562.811	147.63	0.000793	0.0149146	0.138026	5.3948e-08	5.6361e-07	0.429708	2964.8	0.00045264	1.1123e-06	8.9836e-07	0.0584537	8.26875	93.3478
132	0.0538099	9.54259	562.811	125.607	0.00079752	0.0128105	0.118109	4.245e-08	4.6342e-07	0.377172	4252.29	0.00034804	1.1123e-06	7.2193e-07	0.0547486	6.91227	93.3478
133	0.0883579	14.9619	562.811	189.308	0.00074028	0.0186243	0.177761	7.7288e-08	7.369e-07	0.524324	299.13	0.00067386	1.1123e-06	1.2634e-06	0.0658639	9.8215	93.3478
134	0.078553	13.3906	562.811	173.416	0.00084945	0.0167034	0.161619	6.9958e-08	6.3557e-07	0.497212	2012.18	0.00057484	1.1123e-06	1.1046e-06	0.0658639	8.18498	93.3478
135	0.0883579	14.9619	562.811	189.308	0.00074028	0.0186243	0.177761	7.7288e-08	7.369e-07	0.524324	299.13	0.00067386	1.1123e-06	1.2634e-06	0.0658639	9.8215	93.3478
136	0.0448078	7.99039	562.811	106.568	0.00078121	0.0108571	0.101972	3.3268e-08	3.6825e-07	0.32956	5280.77	0.00026893	1.1123e-06	5.8472e-07	0.0518535	5.2183	93.3478
137	0.0448078	7.99039	562.811	106.568	0.00078121	0.0108571	0.101972	3.3268e-08	3.6825e-07	0.32956	5280.77	0.00026893	1.1123e-06	5.8472e-07	0.0518535	5.2183	93.3478
138	0.0448078	7.99039	562.811	106.568	0.00078121	0.0108571	0.101972	3.3268e-08	3.6825e-07	0.32956	5280.77	0.00026893	1.1123e-06	5.8472e-07	0.0518535	5.2183	93.3478
139	0.0412469	7.45393	562.811	100.369	0.00080744	0.010331	0.0965048	2.9434e-08	3.398e-07	0.317518	5949.3	0.00023221	1.1123e-06	5.2682e-07	0.0516776	4.91195	93.3478
140	0.0448078	7.99039	562.811	106.568	0.00078121	0.0108571	0.101972	3.3268e-08	3.6825e-07	0.32956	5280.77	0.00026893	1.1123e-06	5.8472e-07	0.0518535	5.2183	73.4455
141	0.0448078	7.99039	562.811	106.568	0.00078121	0.0108571	0.101972	3.3268e-08	3.6825e-07	0.32956	5280.77	0.00026893	1.1123e-06	5.8472e-07	0.0518535	5.2183	53.5432
142	0.0437386	7.83259	562.811	104.764	0.00078991	0.0107094	0.100348	3.2118e-08	3.6024e-07	0.32617	5483.01	0.00025776	1.1123e-06	5.6724e-07	0.0518061	5.14738	33.641
143	0.0272797	5.75333	110.794	76.5081	0.00112424	0.00944059	0.0846315	1.4129e-08	2.5028e-07	0.305576	11054.7	7.0657e-05	8.9685e-07	3.0024e-07	0.0611739	3.98515	13.7387
144	0.0277298	5.58634	122.99	73.4914	0.00097506	0.0087525	0.080678	1.5967e-08	2.3874e-07	0.281606	9371.91	9.806e-05	8.1341e-07	3.224e-07	0.0552391	3.42698	14.5992
145	0.0273274	5.73113	109.231	76.0367	0.00113398	0.00935936	0.0852257	1.3884e-08	2.4123e-07	0.305572	11328.6	7.002e-05	9.0781e-07	3.0031e-07	0.0622332	3.62188	14.0827
146	0.0277298	5.58634	122.99	73.4914	0.00097506	0.0087525	0.080678	1.5967e-08	2.3874e-07	0.281606	9371.91	9.806e-05	8.1341e-07	3.224e-07	0.0552391	3.42698	14.5992
147	0.0846247	14.3661	536.748	181.882	0.0007402	0.0179562	0.171301	7.3669e-08	7.0583e-07	0.507042	680.344	0.00064064	1.0849e-06	1.2069e-06	0.0645487	9.41132	93.3478
148	0.0277298	5.58634	122.99	73.4914	0.00097506	0.0087525	0.080678	1.5967e-08	2.3874e-07	0.281606	9371.91	9.806e-05	8.1341e-07	3.224e-07	0.0552391	3.42698	14.5992
149	0.0275657	5.62045	124.534	74.2808	0.00096608	0.00890704	0.0797759	1.622e-08	2.5363e-07	0.282447	9007.33	9.724e-05	7.9884e-07	3.2026e-07	0.0537545	4.04367	14.1539
150	0.0273274	5.73113	109.231	76.0367	0.00113398	0.00935936	0.0852257	1.3884e-08	2.4123e-07	0.305572	11328.6	7.002e-05	9.0781e-07	3.0031e-07	0.0622332	3.62188	14.0827
151	0.0273274	5.73113	109.231	76.0367	0.00113398	0.00935936	0.0852257	1.3884e-08	2.4123e-07	0.305572	11328.6	7.002e-05	9.0781e-07	3.0031e-07	0.0622332	3.62188	14.0827
152	0.0277298	5.58634	122.99	73.4914	0.00097506	0.0087525	0.080678	1.5967e-08	2.3874e-07	0.281606	9371.91	9.806e-05	8.1341e-07	3.224e-07	0.0552391	3.42698	14.5992
153	0.0883579	14.9619	562.811	189.308	0.00074028	0.0186243	0.177761	7.7288e-08	7.369e-07	0.524324	299.13	0.00067386	1.1123e-06	1.2634e-06	0.0658639	9.8215	87.1628
154	0.0273274	5.73113	109.231	76.0367	0.00113398	0.00935936	0.0852257	1.3884e-08	2.4123e-07	0.305572	11328.6	7.002e-05	9.0781e-07	3.0031e-07	0.0622332	3.62188	14.0827
155	0.0273274	5.73113	109.231	76.0367	0.00113398	0.00935936	0.0852257	1.3884e-08	2.4123e-07	0.305572	11328.6	7.002e-05	9.0781e-07	3.0031e-07	0.0622332	3.62188	14.0827
156	0.0273274	5.73113	109.231	76.0367	0.00113398	0.00935936	0.0852257	1.3884e-08	2.4123e-07	0.305572	11328.6	7.002e-05	9.0781e-07	3.0031e-07	0.0622332	3.62188	14.0827
157	0.0359852	6.75828	191.833	87.675	0.00083095	0.00974956	0.0900061	2.5699e-08	3.123e-07	0.298247	6622.82	0.00019328	7.8074e-07	4.6148e-07	0.0510435	4.51356	25.0392
158	0.0293859	5.83583	132.057	76.4642	0.00099449	0.00900737	0.0843639	1.7189e-08	2.4396e-07	0.290713	9589.39	0.00011023	8.4183e-07	3.4582e-07	0.0572662	3.27543	15.7046

## Sheet: OR_out_today
Table S8
Caption:	Objective reduction results for the ‘today’ scenario. Normalization variant N3 yields the same results as variant N2 since they differ only by a constant offset of 1. #OB: number of omitted objectives, 0: kept objective, 1: omitted objective.
Normalization variant	#OB	delta	delta_rel	acidification	GWI	ecotoxicity_freshwater	energy_resources_non_renewable	eutrophication_freshwater	eutrophication_marine	eutrophication_terrestrial	human_toxicity_carcinogenic	human_toxicity_non_carcinogenic	ionising_radiation_human_health	land_use	resources_metals_minerals	ozone_depletion	particulate_matter_formation	photochemical_ozone_formation_human_health	water_use	C
N1	1	0	0	1	0	0	0	0	0	0	0	0	0	0	0	0	0	0	0	0
N1	2	0	0	1	1	0	0	0	0	0	0	0	0	0	0	0	0	0	0	0
N1	3	0	0	1	1	1	0	0	0	0	0	0	0	0	0	0	0	0	0	0
N1	4	0	0	0	1	1	0	0	0	1	0	0	1	0	0	0	0	0	0	0
N1	5	0	0	1	1	1	0	0	0	1	0	0	1	0	0	0	0	0	0	0
N1	6	0	0	1	1	1	0	0	1	1	0	0	1	0	0	0	0	0	0	0
N1	7	0	0	1	1	1	0	0	0	1	0	1	1	0	0	0	0	1	0	0
N1	8	0	0	1	1	1	0	0	1	1	0	1	1	0	0	0	0	1	0	0
N1	8	0	0	1	1	1	0	0	1	1	0	1	1	0	0	1	0	0	0	0
N1	8	0	0	1	1	1	0	0	0	1	0	1	1	0	0	1	0	1	0	0
N1	8	0	0	1	1	1	0	0	1	1	0	1	0	0	0	1	0	1	0	0
N1	8	0	0	1	1	1	0	0	1	1	0	0	1	0	0	1	0	1	0	0
N1	8	0	0	0	1	1	0	0	1	1	0	1	1	0	0	1	0	1	0	0
N1	9	0	0	1	1	1	0	0	1	1	0	1	1	0	0	1	0	1	0	0
N1	10	0.154651	0.154651	1	1	1	0	0	1	1	0	1	1	0	0	1	0	1	1	0
N1	11	0.757539	0.757539	0	1	1	0	0	1	1	1	1	1	0	0	1	1	1	1	0
N1	11	0.757539	0.757539	1	1	0	1	0	1	1	1	1	1	0	0	0	1	1	1	0
N1	11	0.757539	0.757539	1	1	1	0	0	1	1	1	1	1	0	0	1	0	1	1	0
N1	11	0.757539	0.757539	0	1	0	1	0	1	1	1	1	1	0	0	1	1	1	1	0
N1	11	0.757539	0.757539	1	1	1	0	0	1	1	1	1	1	0	0	0	1	1	1	0
N1	12	0.803312	0.803312	1	1	1	0	0	1	1	1	1	1	0	0	1	1	1	1	0
N1	13	0.962676	0.962676	1	1	1	1	0	1	1	1	1	1	0	0	1	1	1	1	0
N1	14	1	1	1	1	1	1	1	1	1	1	1	1	1	1	1	1	0	0	0
N1	15	1	1	1	1	1	1	1	1	1	1	1	1	1	1	1	1	1	0	0
N1	16	1	1	1	1	1	1	1	1	1	1	1	1	1	1	1	1	1	1	0
N2	1	0	0	1	0	0	0	0	0	0	0	0	0	0	0	0	0	0	0	0
N2	2	0	0	1	1	0	0	0	0	0	0	0	0	0	0	0	0	0	0	0
N2	3	0	0	1	1	1	0	0	0	0	0	0	0	0	0	0	0	0	0	0
N2	4	0	0	0	1	1	0	0	0	1	0	0	1	0	0	0	0	0	0	0
N2	5	0	0	1	1	1	0	0	0	1	0	0	1	0	0	0	0	0	0	0
N2	6	0	0	1	1	1	0	0	0	1	0	1	1	0	0	0	0	0	0	0
N2	7	0	0	1	1	1	0	0	1	1	0	1	1	0	0	0	0	0	0	0
N2	8	0	0	1	1	1	0	0	1	1	0	1	1	0	0	1	0	0	0	0
N2	8	0	0	1	1	1	0	0	1	1	0	1	1	0	0	0	0	1	0	0
N2	8	0	0	1	1	0	0	0	1	1	0	1	1	0	0	1	0	1	0	0
N2	8	0	0	1	1	1	0	0	1	0	0	1	1	0	0	1	0	1	0	0
N2	8	0	0	1	1	1	0	0	1	1	0	0	1	0	0	1	0	1	0	0
N2	8	0	0	1	0	1	0	0	1	1	0	1	1	0	0	1	0	1	0	0
N2	9	0	0	1	1	1	0	0	1	1	0	1	1	0	0	1	0	1	0	0
N2	10	0.142167	0.00297454	1	1	1	0	0	1	1	0	1	1	0	0	1	0	1	1	0
N2	11	1.5546	0.0325267	1	1	1	0	0	1	1	0	1	1	0	0	1	1	1	1	0
N2	12	2.45638	0.0513946	1	1	1	0	0	1	1	1	1	1	0	0	1	1	1	1	0
N2	13	3.33892	0.06986	1	1	1	1	1	1	1	0	1	1	0	0	1	1	1	1	0
N2	13	3.33892	0.06986	1	1	1	1	0	1	1	1	1	1	0	0	1	1	1	1	0
N2	14	4.41624	0.0924006	1	1	1	1	1	1	1	1	1	1	0	0	1	1	1	1	0
N2	15	15.4519	0.323299	1	1	1	1	1	1	1	1	1	1	0	1	1	1	1	1	0
N2	16	47.7945	1	1	1	1	1	1	1	1	1	1	1	1	1	1	1	1	1	0
N4	1	0	0	1	0	0	0	0	0	0	0	0	0	0	0	0	0	0	0	0
N4	2	0	0	1	1	0	0	0	0	0	0	0	0	0	0	0	0	0	0	0
N4	3	0	0	1	1	1	0	0	0	0	0	0	0	0	0	0	0	0	0	0
N4	4	0	0	0	1	1	0	0	0	1	0	0	1	0	0	0	0	0	0	0
N4	5	0	0	0	1	1	0	0	1	1	0	0	1	0	0	0	0	0	0	0
N4	6	0	0	1	1	1	0	0	0	1	0	0	1	0	0	0	0	1	0	0
N4	7	0	0	1	1	1	0	0	1	1	0	1	1	0	0	0	0	0	0	0
N4	8	0	0	1	1	1	0	0	1	1	0	0	1	0	0	1	0	1	0	0
N4	8	0	0	1	1	1	0	0	1	1	0	1	1	0	0	0	0	1	0	0
N4	8	0	0	1	1	1	0	0	1	1	0	1	0	0	0	1	0	1	0	0
N4	8	0	0	1	1	1	0	0	1	1	0	1	1	0	0	1	0	0	0	0
N4	8	0	0	0	1	1	0	0	1	1	0	1	1	0	0	1	0	1	0	0
N4	8	0	0	1	1	1	0	0	1	0	0	1	1	0	0	1	0	1	0	0
N4	9	0	0	1	1	1	0	0	1	1	0	1	1	0	0	1	0	1	0	0
N4	10	0.0740731	0.0756229	1	1	1	0	0	1	1	0	1	1	0	0	1	0	1	1	0
N4	11	0.529634	0.540715	1	1	1	0	0	1	1	0	1	1	0	0	1	1	1	1	0
N4	11	0.529634	0.540715	1	1	0	0	0	1	1	1	1	1	0	0	1	1	1	1	0
N4	12	0.549726	0.561228	1	1	1	0	0	1	1	1	1	1	0	0	1	1	1	1	0
N4	13	0.747234	0.762869	1	1	1	1	1	1	1	0	1	1	0	0	1	1	1	1	0
N4	13	0.747234	0.762869	1	1	1	1	0	1	1	1	1	1	0	0	1	1	1	1	0
N4	14	0.787297	0.803769	1	1	1	1	1	1	1	1	1	1	0	0	1	1	1	1	0
N4	15	0.937569	0.957186	1	1	1	1	1	1	1	1	1	1	0	1	1	1	1	1	0
N4	16	0.979506	1	1	1	1	1	1	1	1	1	1	1	1	1	1	1	1	1	0

## Sheet: OR_out_future
Table S9
Caption:	Objective reduction results for the ‘future’ scenario. Normalization variant N3 yields the same results as variant N2 since they differ only by a constant offset of 1. #OB: number of omitted objectives, 0: kept objective, 1: omitted objective.
Normalization variant	#OB	delta	delta_rel	acidification	GWI	ecotoxicity_freshwater	energy_resources_non_renewable	eutrophication_freshwater	eutrophication_marine	eutrophication_terrestrial	human_toxicity_carcinogenic	human_toxicity_non_carcinogenic	ionising_radiation_human_health	land_use	resources_metals_minerals	ozone_depletion	particulate_matter_formation	photochemical_ozone_formation_human_health	water_use	C
N1	1	0	0	1	0	0	0	0	0	0	0	0	0	0	0	0	0	0	0	0
N1	2	0	0	1	1	0	0	0	0	0	0	0	0	0	0	0	0	0	0	0
N1	3	0	0	1	1	0	0	0	0	0	0	0	1	0	0	0	0	0	0	0
N1	4	0	0	1	1	0	0	0	1	0	0	0	1	0	0	0	0	0	0	0
N1	5	0	0	1	1	0	0	0	1	0	0	0	1	0	0	0	0	1	0	0
N1	6	0	0	1	1	0	0	0	1	1	0	0	1	0	0	1	0	0	0	0
N1	7	0	0	1	1	0	0	0	1	1	1	1	0	0	0	0	1	0	0	0
N1	8	0	0	1	1	0	0	1	1	1	1	0	0	0	0	1	0	1	0	0
N1	9	0	0	1	1	0	0	1	1	0	1	1	0	0	0	1	1	1	0	0
N1	9	0	0	1	1	0	0	1	1	1	1	1	0	0	0	1	0	1	0	0
N1	9	0	0	1	1	0	0	1	1	1	1	0	1	0	0	1	1	0	0	0
N1	9	0	0	1	1	0	0	0	1	1	1	0	1	0	0	1	1	1	0	0
N1	9	0	0	1	1	0	0	1	1	1	1	1	0	0	0	1	1	0	0	0
N1	9	0	0	1	1	0	0	0	1	1	1	1	0	0	0	1	1	1	0	0
N1	10	0	0	1	1	0	0	1	1	1	1	0	1	0	0	1	1	1	0	0
N1	10	0	0	1	1	0	0	1	1	1	1	1	0	0	0	1	1	1	0	0
N1	11	0.24102	0.24102	1	1	1	0	1	1	1	1	0	1	0	0	1	1	1	0	0
N1	11	0.24102	0.24102	1	1	1	0	1	1	1	1	1	0	0	0	1	1	1	0	0
N1	12	0.382395	0.382395	1	1	1	0	1	1	1	1	0	1	0	0	1	1	1	1	0
N1	12	0.382395	0.382395	1	1	1	0	1	1	1	1	1	0	0	0	1	1	1	1	0
N1	13	0.895439	0.895439	1	1	1	1	1	1	1	1	0	1	0	0	1	1	1	1	0
N1	13	0.895439	0.895439	1	1	1	1	1	1	1	1	1	0	0	0	1	1	1	1	0
N1	14	0.993184	0.993184	1	1	1	1	1	1	1	1	1	1	0	0	1	1	1	1	0
N1	15	1	1	1	1	1	1	1	1	1	1	1	1	1	0	1	1	1	1	0
N1	16	1	1	1	1	1	1	1	1	1	1	1	1	1	1	1	1	1	1	0
N2	1	0	0	1	0	0	0	0	0	0	0	0	0	0	0	0	0	0	0	0
N2	2	0	0	1	1	0	0	0	0	0	0	0	0	0	0	0	0	0	0	0
N2	3	0	0	1	1	0	0	0	0	0	0	0	1	0	0	0	0	0	0	0
N2	4	0	0	1	1	0	0	0	1	0	0	0	1	0	0	0	0	0	0	0
N2	5	0	0	1	1	0	0	0	1	0	0	0	1	0	0	0	0	1	0	0
N2	6	0	0	1	1	0	0	0	1	1	0	0	1	0	0	0	0	1	0	0
N2	7	0	0	1	1	0	0	1	1	1	0	0	1	0	0	0	0	1	0	0
N2	8	0	0	1	1	0	0	1	1	1	1	0	1	0	0	0	0	1	0	0
N2	9	0	0	1	1	0	0	1	1	1	1	1	0	0	0	0	1	1	0	0
N2	9	0	0	0	1	0	0	1	1	1	1	1	0	0	0	1	1	1	0	0
N2	9	0	0	1	1	0	0	1	1	1	1	1	0	0	0	1	0	1	0	0
N2	9	0	0	1	1	0	0	0	1	1	1	1	0	0	0	1	1	1	0	0
N2	9	0	0	1	1	0	0	1	0	1	1	1	0	0	0	1	1	1	0	0
N2	9	0	0	1	0	0	0	1	1	1	1	1	0	0	0	1	1	1	0	0
N2	10	0	0	1	1	0	0	1	1	1	1	1	0	0	0	1	1	1	0	0
N2	10	0	0	1	1	0	0	1	1	1	1	0	1	0	0	1	1	1	0	0
N2	11	0.57767	0.0156669	1	1	0	0	1	1	1	1	0	1	0	0	1	1	1	1	0
N2	11	0.57767	0.0156669	1	1	0	0	1	1	1	1	1	0	0	0	1	1	1	1	0
N2	12	0.647064	0.0175489	1	1	0	0	1	1	1	1	1	1	0	0	1	1	1	1	0
N2	13	1.01226	0.0274533	1	1	1	0	1	1	1	1	1	1	0	0	1	1	1	1	0
N2	14	2.16508	0.0587187	1	1	1	1	1	1	1	1	1	1	0	0	1	1	1	1	0
N2	15	8.62383	0.233885	1	1	1	1	1	1	1	1	1	1	0	1	1	1	1	1	0
N2	16	36.872	1	1	1	1	1	1	1	1	1	1	1	1	1	1	1	1	1	0
N4	1	0	0	1	0	0	0	0	0	0	0	0	0	0	0	0	0	0	0	0
N4	2	0	0	1	1	0	0	0	0	0	0	0	0	0	0	0	0	0	0	0
N4	3	0	0	1	1	0	0	0	0	0	0	0	1	0	0	0	0	0	0	0
N4	4	0	0	1	1	0	0	0	1	0	0	0	1	0	0	0	0	0	0	0
N4	5	0	0	1	1	0	0	0	1	0	0	0	1	0	0	0	0	1	0	0
N4	6	0	0	1	1	0	0	0	1	1	0	0	1	0	0	0	0	1	0	0
N4	7	0	0	1	1	0	0	1	1	1	1	0	1	0	0	0	0	0	0	0
N4	8	0	0	1	1	0	0	0	1	1	1	0	0	0	0	1	1	1	0	0
N4	9	0	0	1	1	0	0	1	1	0	1	0	1	0	0	1	1	1	0	0
N4	9	0	0	1	1	0	0	1	1	1	1	0	0	0	0	1	1	1	0	0
N4	9	0	0	1	1	0	0	1	1	0	1	1	0	0	0	1	1	1	0	0
N4	9	0	0	1	1	0	0	1	1	1	0	0	1	0	0	1	1	1	0	0
N4	9	0	0	1	1	0	0	0	1	1	1	0	1	0	0	1	1	1	0	0
N4	9	0	0	1	1	0	0	1	1	1	1	1	0	0	0	1	1	0	0	0
N4	10	0	0	1	1	0	0	1	1	1	1	0	1	0	0	1	1	1	0	0
N4	10	0	0	1	1	0	0	1	1	1	1	1	0	0	0	1	1	1	0	0
N4	11	0.113974	0.117065	1	1	0	0	1	1	1	1	0	1	0	0	1	1	1	1	0
N4	12	0.19646	0.201788	1	1	1	0	1	1	1	1	1	0	0	0	1	1	1	1	0
N4	12	0.19646	0.201788	1	1	1	0	1	1	1	1	0	1	0	0	1	1	1	1	0
N4	13	0.281779	0.289421	1	1	1	0	1	1	1	1	1	1	0	0	1	1	1	1	0
N4	14	0.607619	0.624099	1	1	1	1	1	1	1	1	1	1	0	0	1	1	1	1	0
N4	15	0.896091	0.920394	1	1	1	1	1	1	1	1	1	1	0	1	1	1	1	1	0
N4	16	0.973595	1	1	1	1	1	1	1	1	1	1	1	1	1	1	1	1	1	0

## Sheet: CORR_today
Table S10
Caption:	Correlation matrix of the initial Pareto-optimal solutions of the ‘today’ scenario generated in the full objective space.
	acidification	GWI	ecotoxicity_freshwater	energy_resources_non_renewable	eutrophication_freshwater	eutrophication_marine	eutrophication_terrestrial	human_toxicity_carcinogenic	human_toxicity_non_carcinogenic	ionising_radiation_human_health	land_use	resources_metals_minerals	ozone_depletion	particulate_matter_formation	photochemical_ozone_formation_human_health	water_use	C
acidification	1
GWI	0.967795	1
ecotoxicity_freshwater	0.838693	0.765232	1
energy_resources_non_renewable	0.97936	0.986376	0.798678	1
eutrophication_freshwater	0.698271	0.850321	0.473296	0.779513	1
eutrophication_marine	0.997353	0.962584	0.832545	0.969181	0.698574	1
eutrophication_terrestrial	0.99377	0.984619	0.812517	0.982467	0.766964	0.994507	1
human_toxicity_carcinogenic	0.911451	0.835222	0.81357	0.833222	0.564393	0.92754	0.905699	1
human_toxicity_non_carcinogenic	0.948762	0.931618	0.805131	0.909125	0.749572	0.962285	0.963214	0.961556	1
ionising_radiation_human_health	0.889452	0.97101	0.675237	0.925253	0.944259	0.889131	0.930097	0.767839	0.904858	1
land_use	-0.80165	-0.885763	-0.661269	-0.846156	-0.884464	-0.788297	-0.83264	-0.729479	-0.842069	-0.919856	1
resources_metals_minerals	0.889707	0.835874	0.796615	0.819947	0.623026	0.907036	0.894874	0.984574	0.972957	0.799202	-0.779168	1
ozone_depletion	0.734774	0.65918	0.856167	0.702033	0.370936	0.728644	0.704266	0.691708	0.68586	0.562491	-0.54933	0.669211	1
particulate_matter_formation	0.947849	0.837832	0.842843	0.877863	0.443739	0.949389	0.91377	0.929556	0.885802	0.704671	-0.625711	0.879996	0.752215	1
photochemical_ozone_formation_human_health	0.899885	0.782007	0.775137	0.834335	0.377765	0.906791	0.866761	0.848082	0.80534	0.636948	-0.467571	0.778867	0.699856	0.962593	1
water_use	0.939205	0.843478	0.882961	0.891568	0.489461	0.939838	0.910895	0.91822	0.893202	0.724473	-0.675765	0.885674	0.797578	0.968804	0.923316	1
C	0.452796	0.418865	0.465932	0.430238	0.313108	0.468038	0.459014	0.485761	0.49215	0.390126	-0.347117	0.500649	0.411727	0.453017	0.438011	0.492212	1

## Sheet: CORR_future
Table S11
Caption:	Correlation matrix of the initial Pareto-optimal solutions of the ‘future’ scenario generated in the full objective space.
	acidification	GWI	ecotoxicity_freshwater	energy_resources_non_renewable	eutrophication_freshwater	eutrophication_marine	eutrophication_terrestrial	human_toxicity_carcinogenic	human_toxicity_non_carcinogenic	ionising_radiation_human_health	land_use	resources_metals_minerals	ozone_depletion	particulate_matter_formation	photochemical_ozone_formation_human_health	water_use	C
acidification	1
GWI	0.995953	1
ecotoxicity_freshwater	0.859923	0.870463	1
energy_resources_non_renewable	0.923077	0.951995	0.883942	1
eutrophication_freshwater	-0.76151	-0.721986	-0.640765	-0.597604	1
eutrophication_marine	0.994736	0.993127	0.841255	0.917556	-0.710507	1
eutrophication_terrestrial	0.997289	0.994543	0.84053	0.918229	-0.722196	0.998521	1
human_toxicity_carcinogenic	0.993015	0.979602	0.834483	0.877508	-0.786025	0.986194	0.989404	1
human_toxicity_non_carcinogenic	0.992265	0.980809	0.829656	0.877647	-0.770288	0.992794	0.991794	0.995558	1
ionising_radiation_human_health	0.978996	0.980121	0.844858	0.906137	-0.632672	0.98842	0.987372	0.971189	0.975586	1
land_use	-0.965447	-0.946802	-0.84234	-0.847972	0.892555	-0.941649	-0.946613	-0.974934	-0.966217	-0.908734	1
resources_metals_minerals	0.989828	0.973268	0.821275	0.86147	-0.813984	0.98156	0.985209	0.997714	0.995067	0.960462	-0.980006	1
ozone_depletion	0.66877	0.680259	0.770436	0.675898	-0.347745	0.677811	0.672577	0.647501	0.65423	0.705391	-0.5951	0.630964	1
particulate_matter_formation	0.997367	0.987199	0.838299	0.895429	-0.789933	0.990864	0.993924	0.997612	0.996022	0.97056	-0.974242	0.99721	0.647929	1
photochemical_ozone_formation_human_health	0.674451	0.712238	0.535012	0.741637	-0.0624041	0.722887	0.71856	0.628679	0.64611	0.764529	-0.459806	0.600299	0.584587	0.641847	1
water_use	0.943057	0.963993	0.892031	0.964632	-0.614877	0.949144	0.941694	0.908936	0.922427	0.949171	-0.879443	0.896645	0.701525	0.92035	0.714546	1
C	0.436583	0.434486	0.445008	0.420001	-0.424461	0.424418	0.419931	0.434869	0.436308	0.40577	-0.469933	0.434275	0.334369	0.435071	0.155384	0.443737	1

## Sheet: SOL_red_today
Table S12
Caption:	Pareto-optimal solutions generated in the reduced objective space in the ‘today’ scenario.
#	acidification	GWI	ecotoxicity_freshwater	energy_resources_non_renewable	eutrophication_freshwater	eutrophication_marine	eutrophication_terrestrial	human_toxicity_carcinogenic	human_toxicity_non_carcinogenic	ionising_radiation_human_health	land_use	resources_metals_minerals	ozone_depletion	particulate_matter_formation	photochemical_ozone_formation_human_health	water_use	C
1	0.274937	94.044	1061.97	1330.74	0.00923027	0.0485413	0.537059	6.6548e-08	1.0864e-06	3.53567	1443.18	0.00051389	6.6219e-06	2.0879e-06	0.162023	18.139	61.9417
2	0.299471	101.721	1166.79	1439	0.00980178	0.0524625	0.580762	7.487e-08	1.1854e-06	3.80234	361.956	0.00058632	7.1739e-06	2.3067e-06	0.172237	19.6288	71.4341
3	0.192033	66.8182	730.191	944.552	0.0070572	0.0350164	0.38716	4.349e-08	7.693e-07	2.5747	4146.23	0.00032263	4.6187e-06	1.402e-06	0.125088	12.9137	39.6577
4	0.208857	72.3435	797.23	1022.97	0.00749536	0.0377627	0.417548	4.8126e-08	8.3344e-07	2.76935	3605.62	0.00036093	5.0288e-06	1.5411e-06	0.132599	13.9766	44.1008
5	0.274937	94.044	1061.97	1330.74	0.00923027	0.0485413	0.537059	6.6548e-08	1.0864e-06	3.53567	1443.18	0.00051389	6.6219e-06	2.0879e-06	0.162023	18.139	61.9417
6	0.286816	97.9458	1115.24	1385.29	0.00959914	0.050464	0.559185	7.0688e-08	1.1368e-06	3.68098	902.566	0.00055132	6.8394e-06	2.1869e-06	0.167008	18.8744	66.5914
7	0.286816	97.9458	1115.24	1385.29	0.00959914	0.050464	0.559185	7.0688e-08	1.1368e-06	3.68098	902.566	0.00055132	6.8394e-06	2.1869e-06	0.167008	18.8744	66.5914
8	0.163377	57.7026	565.974	821.067	0.00598527	0.030278	0.332124	2.774e-08	5.9952e-07	2.20469	6849.28	0.00017087	4.4634e-06	1.1441e-06	0.11675	10.4543	22.6998
9	0.242702	83.458	931.842	1180.74	0.00837407	0.0432859	0.478648	5.7418e-08	9.6213e-07	3.16054	2524.4	0.00043755	5.8567e-06	1.8211e-06	0.147723	16.1107	52.9882
10	0.20077	70.6794	640.07	1014.18	0.00650615	0.0361818	0.394042	2.5892e-08	6.4896e-07	2.58983	7930.5	0.00012411	6.1675e-06	1.4141e-06	0.138511	11.8758	17.3506
11	0.215909	75.7882	665.769	1090.94	0.0066267	0.0385392	0.418186	2.4707e-08	6.6361e-07	2.73052	8471.11	9.9601e-05	6.922e-06	1.5283e-06	0.147527	12.3818	14.6689
12	0.155732	54.607	572.487	772.975	0.00590634	0.0290281	0.319711	3.1947e-08	6.1426e-07	2.12072	5768.06	0.0002216	3.9114e-06	1.1102e-06	0.110063	10.3766	28.5369
13	0.193717	67.1366	710.142	952.749	0.00675096	0.0351431	0.386091	4.0292e-08	7.43e-07	2.54204	4686.84	0.00028438	4.9967e-06	1.4213e-06	0.126828	12.7059	35.3735
14	0.225779	77.9007	864.536	1101.85	0.00793471	0.0405243	0.448098	5.2772e-08	8.9778e-07	2.96494	3065.01	0.00039924	5.4427e-06	1.6811e-06	0.140161	15.0437	48.5454
15	0.215909	75.7882	665.769	1090.94	0.0066267	0.0385392	0.418186	2.4707e-08	6.6361e-07	2.73052	8471.11	9.9601e-05	6.922e-06	1.5283e-06	0.147527	12.3818	14.6689
16	0.242702	83.458	931.842	1180.74	0.00837407	0.0432859	0.478648	5.7418e-08	9.6213e-07	3.16054	2524.4	0.00043755	5.8567e-06	1.8211e-06	0.147723	16.1107	52.9882
17	0.259625	89.0153	999.149	1259.62	0.00881342	0.0460475	0.509198	6.2064e-08	1.0265e-06	3.35613	1983.79	0.00047586	6.2706e-06	1.961e-06	0.155284	17.1778	57.4295
18	0.147315	52.0084	535.475	736.313	0.00573066	0.0277076	0.305204	2.889e-08	5.7874e-07	2.03253	6308.67	0.00019474	3.7274e-06	1.033e-06	0.107186	9.80965	25.5438
19	0.163377	57.7026	565.974	821.067	0.00598527	0.030278	0.332124	2.774e-08	5.9952e-07	2.20469	6849.28	0.00017087	4.4634e-06	1.1441e-06	0.11675	10.4543	22.6998
20	0.234802	80.0746	902.437	1133.08	0.00790327	0.0419034	0.46177	5.6662e-08	9.3484e-07	3.0172	2524.4	0.00043142	5.7234e-06	1.7869e-06	0.143402	15.6061	53.1029
21	0.192033	66.8182	730.191	944.552	0.0070572	0.0350164	0.38716	4.349e-08	7.693e-07	2.5747	4146.23	0.00032263	4.6187e-06	1.402e-06	0.125088	12.9137	39.6577
22	0.222897	76.6663	853.807	1084.46	0.00776293	0.0400199	0.441939	5.2496e-08	8.8783e-07	2.91264	3065.01	0.000397	5.3941e-06	1.6686e-06	0.138585	14.8595	48.5886
23	0.182567	64.5008	605.724	921.814	0.00631857	0.0333353	0.364585	2.6855e-08	6.2716e-07	2.41412	7389.89	0.00014822	5.3036e-06	1.2775e-06	0.127932	11.2186	20.0264
24	0.182567	64.5008	605.724	921.814	0.00631857	0.0333353	0.364585	2.6855e-08	6.2716e-07	2.41412	7389.89	0.00014822	5.3036e-06	1.2775e-06	0.127932	11.2186	20.0264
25	0.183043	63.407	659.866	900.929	0.00632457	0.0333393	0.365292	3.6507e-08	6.922e-07	2.39376	5227.45	0.00024976	4.8483e-06	1.3403e-06	0.122478	11.8902	31.6283
26	0.191802	65.6586	739.524	927.582	0.0067601	0.034841	0.383989	4.6464e-08	7.7925e-07	2.51038	3605.62	0.00035123	4.6058e-06	1.4439e-06	0.123494	12.8962	45.0674
27	0.13054	45.9928	409.634	658.261	0.00463967	0.0248156	0.268958	1.6209e-08	4.419e-07	1.73862	9011.72	6.414e-05	4.0411e-06	9.0158e-07	0.105344	7.80752	12.3218
28	0.155732	54.607	572.487	772.975	0.00590634	0.0290281	0.319711	3.1947e-08	6.1426e-07	2.12072	5768.06	0.0002216	3.9114e-06	1.1102e-06	0.110063	10.3766	28.5369
29	0.182567	64.5008	605.724	921.814	0.00631857	0.0333353	0.364585	2.6855e-08	6.2716e-07	2.41412	7389.89	0.00014822	5.3036e-06	1.2775e-06	0.127932	11.2186	20.0264
30	0.147315	52.0084	535.475	736.313	0.00573066	0.0277076	0.305204	2.889e-08	5.7874e-07	2.03253	6308.67	0.00019474	3.7274e-06	1.033e-06	0.107186	9.80965	25.5438
31	0.193717	67.1366	710.142	952.749	0.00675096	0.0351431	0.386091	4.0292e-08	7.43e-07	2.54204	4686.84	0.00028438	4.9967e-06	1.4213e-06	0.126828	12.7059	35.3735
32	0.183779	62.8975	673.129	893.027	0.00616418	0.0333991	0.3649	3.931e-08	7.0831e-07	2.36278	4686.84	0.00027653	4.8273e-06	1.3776e-06	0.121391	12.0598	35.694
33	0.163377	57.7026	565.974	821.067	0.00598527	0.030278	0.332124	2.774e-08	5.9952e-07	2.20469	6849.28	0.00017087	4.4634e-06	1.1441e-06	0.11675	10.4543	22.6998
34	0.13054	45.9928	409.634	658.261	0.00463967	0.0248156	0.268958	1.6209e-08	4.419e-07	1.73862	9011.72	6.414e-05	4.0411e-06	9.0158e-07	0.105344	7.80752	12.3218
35	0.20077	70.6793	640.07	1014.18	0.00650615	0.0361818	0.394041	2.5892e-08	6.4896e-07	2.58983	7930.5	0.00012411	6.1675e-06	1.4141e-06	0.138511	11.8758	17.3506
36	0.20077	70.6794	640.07	1014.18	0.00650615	0.0361818	0.394042	2.5892e-08	6.4896e-07	2.58983	7930.5	0.00012411	6.1675e-06	1.4141e-06	0.138511	11.8758	17.3506
37	0.163377	57.7026	565.974	821.067	0.00598527	0.030278	0.332124	2.774e-08	5.9952e-07	2.20469	6849.28	0.00017087	4.4634e-06	1.1441e-06	0.11675	10.4543	22.6998
38	0.139341	48.5499	506.588	687.484	0.00525213	0.0263071	0.288216	2.8303e-08	5.5166e-07	1.88643	6308.67	0.00019047	3.587e-06	1.0001e-06	0.102877	9.27893	25.5579
39	0.139178	48.5992	475.596	691.752	0.00502655	0.0262057	0.285707	2.3589e-08	5.1264e-07	1.85624	7389.89	0.00013884	3.9178e-06	9.8887e-07	0.105501	8.80019	20.0548
40	0.215909	75.7882	665.769	1090.94	0.0066267	0.0385392	0.418186	2.4707e-08	6.6361e-07	2.73052	8471.11	9.9601e-05	6.922e-06	1.5283e-06	0.147527	12.3818	14.6689
41	0.194136	68.0238	618.133	976.262	0.00620803	0.0350578	0.380948	2.5406e-08	6.2916e-07	2.48636	7930.5	0.00012163	6.0032e-06	1.3784e-06	0.135005	11.4777	17.3548
42	0.159544	54.8242	495.432	788.257	0.00482481	0.0293452	0.314635	2.0755e-08	5.1902e-07	1.98333	8471.11	8.7208e-05	5.1758e-06	1.1652e-06	0.118359	9.42632	14.7585
43	0.13361	44.44	391.11	641.34	0.0035726	0.0246326	0.263229	1.5943e-08	3.9893e-07	1.56452	9506.19	5.157e-05	4.7111e-06	1.0193e-06	0.107867	6.71461	12.0076

## Sheet: SOL_red_future
Table S13
Caption:	Pareto-optimal solutions generated in the reduced objective space in the ‘future’ scenario.
#	acidification	GWI	ecotoxicity_freshwater	energy_resources_non_renewable	eutrophication_freshwater	eutrophication_marine	eutrophication_terrestrial	human_toxicity_carcinogenic	human_toxicity_non_carcinogenic	ionising_radiation_human_health	land_use	resources_metals_minerals	ozone_depletion	particulate_matter_formation	photochemical_ozone_formation_human_health	water_use	C
1	0.0429163	7.7797	242.59	100.053	0.000786068	0.0107188	0.100629	3.27843e-08	3.62452e-07	0.321931	5469.22	0.000262159	8.06764e-07	5.71076e-07	0.0518269	4.97759	33.1845
2	0.0453734	8.17187	260.332	104.956	0.000780616	0.0111574	0.104667	3.52563e-08	3.84366e-07	0.332719	5124.54	0.0002848	8.20618e-07	6.0875e-07	0.0523427	5.30442	35.9073
3	0.0784235	13.4172	493.535	170.256	0.000750305	0.0169746	0.160785	6.76701e-08	6.60897e-07	0.48116	1333.15	0.000583591	1.0427e-06	1.11182e-06	0.0624343	8.99148	75.4143
4	0.0817163	13.9494	516.61	176.923	0.000751343	0.0175844	0.166491	7.08747e-08	6.89559e-07	0.496786	988.474	0.000612692	1.06686e-06	1.1615e-06	0.0635626	9.40254	79.0788
5	0.0850133	14.4824	539.713	183.602	0.000752453	0.0181956	0.172207	7.40831e-08	7.18285e-07	0.512448	643.802	0.000641819	1.09108e-06	1.21124e-06	0.0646939	9.8152	82.7439
6	0.0883579	14.9619	562.811	189.308	0.000740278	0.0186243	0.177761	7.72878e-08	7.36901e-07	0.524324	299.13	0.000673862	1.11225e-06	1.26337e-06	0.0658639	9.8215	87.1628
7	0.0272797	5.75333	110.794	76.5081	0.00112424	0.00944059	0.0846315	1.41289e-08	2.50277e-07	0.305576	11054.7	7.06569e-05	8.96849e-07	3.00238e-07	0.0611739	3.98515	13.7387
8	0.040899	7.48243	227.762	96.4489	0.000799655	0.0104368	0.0975574	3.07136e-08	3.47717e-07	0.315094	5813.89	0.000242039	7.99587e-07	5.39131e-07	0.0516322	4.83714	30.6505
9	0.0545105	9.65786	324.895	123.634	0.000781038	0.012878	0.120363	4.42303e-08	4.66721e-07	0.376217	4090.53	0.0003658	8.84762e-07	7.46755e-07	0.0551832	6.55519	46.1991
10	0.0591153	10.3178	358.04	131.518	0.000751591	0.0134645	0.127518	4.88494e-08	4.95645e-07	0.391199	3401.18	0.0004117	9.04366e-07	8.1968e-07	0.0559925	6.69172	53.4809
11	0.0687292	11.8593	425.524	150.776	0.000750307	0.0152066	0.144065	5.82235e-08	5.77694e-07	0.435849	2367.16	0.000497396	9.72951e-07	9.65215e-07	0.0591841	7.82764	64.4488
12	0.0622664	10.8207	380.183	137.79	0.000750308	0.014028	0.132919	5.19257e-08	5.22225e-07	0.405641	3056.51	0.000439933	9.26451e-07	8.67477e-07	0.0570172	7.05175	57.1351
13	0.0654978	11.34	402.853	144.283	0.000750307	0.0146173	0.138492	5.50746e-08	5.49959e-07	0.420745	2711.84	0.000468665	9.49701e-07	9.16346e-07	0.0581006	7.43969	60.7923
14	0.0719606	12.3786	448.194	157.27	0.000750306	0.015796	0.149638	6.13724e-08	6.05428e-07	0.450952	2022.49	0.000526128	9.96201e-07	1.01408e-06	0.0602675	8.21559	68.1046
15	0.0274995	5.71958	116.602	75.8609	0.00106564	0.00925502	0.0830415	1.50024e-08	2.51852e-07	0.29742	10294.6	8.15471e-05	8.61664e-07	3.09398e-07	0.0585031	3.99525	13.878
16	0.0272831	5.74784	111.227	76.4209	0.00111877	0.00942144	0.0844517	1.41955e-08	2.50373e-07	0.304753	10984	7.15161e-05	8.93396e-07	3.0083e-07	0.060913	3.98783	13.7509
17	0.0751921	12.8979	470.865	163.763	0.000750305	0.0163853	0.155212	6.45213e-08	6.33162e-07	0.466056	1677.82	0.000554859	1.01945e-06	1.06295e-06	0.0613509	8.60353	71.7598
18	0.0389637	7.19864	213.455	93.014	0.000813826	0.0101709	0.0946488	2.87146e-08	3.33604e-07	0.308716	6158.56	0.000222563	7.93406e-07	5.0837e-07	0.0514976	4.7034	28.1436
19	0.0346811	6.5954	180.22	85.8017	0.000866616	0.00966346	0.0889347	2.40475e-08	3.02371e-07	0.297939	7192.58	0.0001762	7.93229e-07	4.38168e-07	0.0522105	4.40886	22.1491
20	0.037327	6.96379	201.048	90.1905	0.00083008	0.00996288	0.0923318	2.69764e-08	3.2172e-07	0.303996	6503.23	0.000205439	7.90843e-07	4.81929e-07	0.0515818	4.59262	25.7278
21	0.0286439	5.78474	131.905	76.2866	0.000965466	0.00907587	0.0816518	1.72415e-08	2.60986e-07	0.287041	8915.94	0.000107004	8.07118e-07	3.36686e-07	0.0542046	4.09872	14.3621
22	0.0483171	8.6659	281.281	111.243	0.000783475	0.0117594	0.109761	3.81699e-08	4.13692e-07	0.347672	4779.87	0.000310356	8.41675e-07	6.52845e-07	0.0532138	5.81678	38.9452
23	0.0651981	11.2912	400.948	143.675	0.000748285	0.0145602	0.1379	5.4813e-08	5.47774e-07	0.419101	2711.84	0.000466291	9.46088e-07	9.12003e-07	0.057881	7.41869	61.3307
24	0.0513406	9.14996	302.622	117.29	0.000781762	0.0123048	0.114918	4.11362e-08	4.39673e-07	0.361543	4435.2	0.000337498	8.62336e-07	6.98739e-07	0.0541449	6.18086	42.5403
25	0.0588605	10.2763	356.42	131.001	0.000749877	0.013416	0.127015	4.8627e-08	4.93791e-07	0.389803	3401.18	0.000409681	9.01296e-07	8.15987e-07	0.0558057	6.674	53.8809
26	0.0323511	6.28531	161.436	82.1741	0.000906806	0.00944569	0.0861908	2.13995e-08	2.86495e-07	0.294069	7881.92	0.00014918	7.99829e-07	3.98796e-07	0.0530703	4.29308	19.0117
27	0.0560292	9.82817	336.324	125.425	0.000753912	0.0129217	0.122258	4.58319e-08	4.7e-07	0.377291	3745.85	0.000383869	8.83225e-07	7.7275e-07	0.0550153	6.3543	49.8278
28	0.0525687	9.27761	312.227	118.573	0.000753717	0.0123078	0.116257	4.24875e-08	4.41633e-07	0.361332	4090.53	0.000353071	8.57571e-07	7.2039e-07	0.0537635	5.99096	46.6399
29	0.0508087	9.04124	299.13	115.823	0.000773265	0.0121343	0.113774	4.06554e-08	4.32022e-07	0.357164	4435.2	0.000334201	8.54618e-07	6.91644e-07	0.0537562	5.99577	42.5467
30	0.0275574	5.69955	118.981	75.5188	0.00103925	0.00916942	0.0822463	1.53634e-08	2.52618e-07	0.29363	9949.96	8.60676e-05	8.45326e-07	3.12887e-07	0.0572611	4.01086	13.9526
31	0.0311871	6.13048	152.05	80.3632	0.000926919	0.00933716	0.084821	2.00763e-08	2.78574e-07	0.292142	8226.59	0.000135675	8.03144e-07	3.79123e-07	0.053501	4.23562	17.4425
32	0.0335154	6.44019	170.824	83.9856	0.000886694	0.00955428	0.0875612	2.27228e-08	2.94419e-07	0.295997	7537.25	0.000162687	7.96518e-07	4.18474e-07	0.0526399	4.35056	20.5799
33	0.0276153	5.67953	121.36	75.177	0.00101285	0.00908383	0.0814513	1.57246e-08	2.53384e-07	0.289839	9605.28	9.05887e-05	8.28989e-07	3.16378e-07	0.0560191	4.02648	14.0264
34	0.0272797	5.75333	110.794	76.5081	0.00112424	0.00944059	0.0846315	1.41289e-08	2.50277e-07	0.305576	11054.7	7.06569e-05	8.96849e-07	3.00238e-07	0.0611739	3.98515	13.7387
35	0.044364	7.98846	253.818	102.575	0.000769585	0.0109056	0.102592	3.43609e-08	3.73761e-07	0.325925	5124.54	0.000277591	8.07326e-07	5.94646e-07	0.0516037	5.10662	35.9617
36	0.0274214	5.73847	114.105	76.1994	0.00109238	0.00934351	0.0838054	1.46251e-08	2.51307e-07	0.301242	10639.3	7.67758e-05	8.77884e-07	3.05554e-07	0.0597301	3.99269	13.8109
37	0.0323511	6.28531	161.436	82.1741	0.000906806	0.00944569	0.0861908	2.13995e-08	2.86495e-07	0.294069	7881.92	0.00014918	7.99829e-07	3.98796e-07	0.0530703	4.29308	19.0117
38	0.0358774	6.7588	189.828	87.7361	0.000847457	0.00978852	0.0903821	2.54012e-08	3.11094e-07	0.300262	6847.9	0.000189823	7.90499e-07	4.58217e-07	0.0518033	4.49077	23.7723
39	0.0424832	7.70935	239.837	99.1767	0.000783188	0.0106369	0.0997731	3.24063e-08	3.59326e-07	0.319567	5469.22	0.000258721	8.01553e-07	5.64793e-07	0.0515093	4.9485	33.2207
40	0.0406233	7.43764	226.009	95.8912	0.000797821	0.0103847	0.0970128	3.0473e-08	3.45727e-07	0.313589	5813.89	0.00023985	7.9627e-07	5.35132e-07	0.05143	4.81863	30.6727
41	0.0387644	7.16627	212.188	92.6108	0.000812501	0.0101332	0.0942551	2.85406e-08	3.32166e-07	0.307628	6158.56	0.00022098	7.91008e-07	5.05479e-07	0.0513514	4.69002	28.1592
42	0.0369078	6.8957	198.384	89.3426	0.000827292	0.00988357	0.0915038	2.66105e-08	3.18695e-07	0.301709	6503.23	0.00020211	7.858e-07	4.75847e-07	0.0512744	4.56448	25.7586
43	0.0276733	5.65952	123.74	74.8353	0.000986463	0.00899826	0.0806565	1.60858e-08	2.54151e-07	0.28605	9260.61	9.51106e-05	8.12653e-07	3.19869e-07	0.0547772	4.04211	14.0993
44	0.0318925	6.21174	158.526	81.2628	0.000903963	0.00936183	0.0852889	2.09999e-08	2.83345e-07	0.291627	7881.92	0.0001455	7.94367e-07	3.92117e-07	0.052734	4.2685	19.0447
45	0.0300233	5.97569	142.666	78.5529	0.000947035	0.00922868	0.0834518	1.87534e-08	2.70654e-07	0.290217	8571.27	0.000122173	8.06462e-07	3.59453e-07	0.0539318	4.17817	15.8724
46	0.0273571	5.7779	110.774	76.8599	0.00113278	0.009494	0.0850427	1.41173e-08	2.51464e-07	0.307365	11145.9	7.00201e-05	9.02539e-07	3.0054e-07	0.0615704	4.01552	13.7796
